# Supplementary material for: To Every Thing There Is a Season: Phenology and Photoperiodic Control of Seasonal Development in the Invasive Caucasian Population of the Brown Marmorated Stink Bug, Halyomorpha halys (Hemiptera: Heteroptera: Pentatomidae)
Source: MDPI journal article supplement (doi:10.3390/insects13070580), 2022-06-25
Supplement: s1 [file s1]

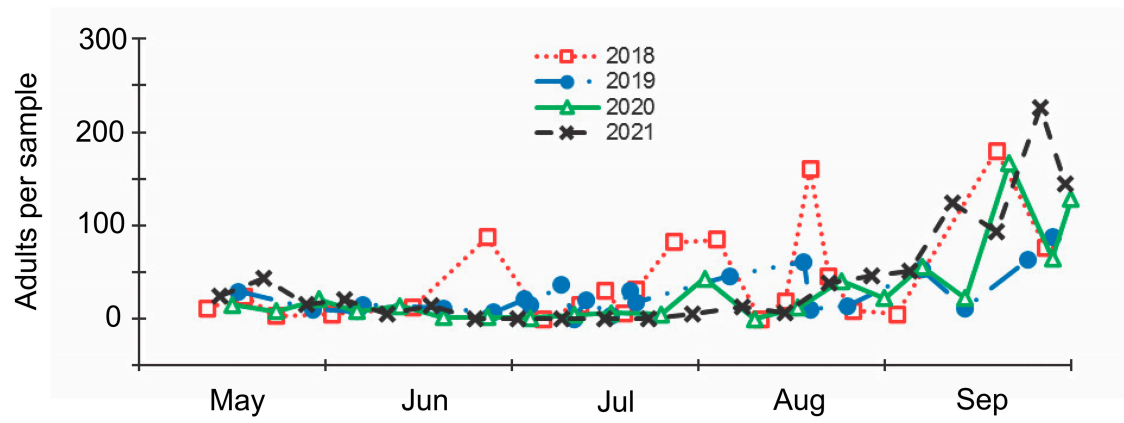

**Figure S2.** Seasonal changes in numbers of *Halyomorpha halys* adults per sample during 2018–2021. Each symbol corresponds to one sample.
