# Supplementary material for: To Every Thing There Is a Season: Phenology and Photoperiodic Control of Seasonal Development in the Invasive Caucasian Population of the Brown Marmorated Stink Bug, Halyomorpha halys (Hemiptera: Heteroptera: Pentatomidae)
Source: Insects. 2022 Jun 25;13(7):580. doi: 10.3390/insects13070580 (PMC9323183; doi:10.3390/insects13070580)
Supplement: Supplementary file 1 [file insects-13-00580-s001.zip]

Archive with 10 entries (10 files):
- H_halys-phenology-Suppl_Figure_S1.pdf
- H_halys-phenology-Suppl_Figure_S2.pdf
- H_halys-phenology-Suppl_Table_S1.xls
- H_halys-phenology-Suppl_Table_S2.xls
- H_halys-phenology-Suppl_Table_S3.xls
- H_halys-phenology-Suppl_Table_S4.xls
- H_halys-phenology-Suppl_Table_S5.xls
- H_halys-phenology-Suppl_Table_S6.xls
- H_halys-phenology-Suppl_Table_S7.xls
- H_halys-phenology-Suppl_Table_S8.xls
