# Supplementary material for: To Every Thing There Is a Season: Phenology and Photoperiodic Control of Seasonal Development in the Invasive Caucasian Population of the Brown Marmorated Stink Bug, Halyomorpha halys (Hemiptera: Heteroptera: Pentatomidae)
Source: Insects. 2022 Jun 25;13(7):580. doi: 10.3390/insects13070580 (PMC9323183; doi:10.3390/insects13070580)
Supplement: Supplementary file 1 [file insects-13-00580-s001.zip › H_halys-phenology-Suppl_Table_S1.xls]

## Sheet: 2018
2018		Table S1. Min and max temperatures for 2018 - 2021 in Sochi, Russia
		January		February		March		April		May		June		July		August		September		October		November		December
		min	max	min	max	min	max	min	max	min	max	min	max	min	max	min	max	min	max	min	max	min	max	min	max
	1	6.8	12.4	0.5	9.5	0.8	18.2	7.3	20.1	15.7	26.6	17.1	24.1	23.4	29.6	24.7	31	19.6	28.1	16.5	26.7	12.9	20.8	10.8	13.7
	2	6.1	8.8	2.7	12.9	-0.9	8.7	10.5	23.9	16.7	26.6	16.5	24.1	21.4	30.1	23.4	30.6	21	29.9	20.2	25.9	13.5	20.4	6.8	12.6
	3	3.5	11.6	9.4	14	6.6	16.2	6.8	12.7	14.6	25.4	16.6	24.9	21.3	29.1	18	29.2	21.3	29.9	17.1	24.8	12.3	22.3	6.5	14.6
	4	6.8	15.9	9.8	15.6	7.7	16.1	5.9	13.3	15	27.1	16.6	24.8	21.8	25.7	18.4	28.4	21.1	30.4	15.7	20.6	13	19.8	8.3	16.7
	5	10.1	16	6.5	18.3	4.2	10.2	6	17	15.8	27.2	17.1	26	21.2	27.7	18.9	29.5	21.5	30.8	9.7	17.6	11.7	18.8	11.6	17.2
	6	8.4	13.9	3.7	11	1.2	16.9	9.7	20.3	15.9	25.5	18.2	25.8	19.1	25.8	21.6	29.2	21.7	29.8	8.2	18.9	12.2	19.2	8.2	14.3
	7	5	12.2	6.2	12.5	10.9	19.5	13.7	19.8	16	25.3	18.1	27.1	19.2	27.8	22.9	30.2	19	27.4	10.8	22.4	12.1	18.8	6.1	8.7
	8	7.3	14	6.4	16.2	10.3	17.1	12.5	20.4	16.3	22.4	17.8	26.6	19.8	28.8	23.1	28.2	16.9	24.1	14.9	23.8	11.1	18	3.4	9.5
	9	4.8	10.2	8.1	17.3	7.7	13.2	12.8	20.6	14.5	20.8	18.4	26.5	21.9	30.4	21.9	25.6	18.2	25.5	15.8	22.4	10.3	18	4.8	12.1
	10	-0.3	6.8	5	11.9	4.5	8	14.1	21	14.8	20.5	16.6	26.5	23.2	30.9	20.8	28.3	17.8	24.2	16.7	24.3	10.5	17.3	8.8	15.5
	11	1.4	11.4	6.4	19.6	5	11.7	9.6	19.9	15.3	21.6	17.8	27.1	23.3	30.3	18.7	28.3	16	22.9	16.1	23.2	9.8	17.7	10.5	17.9
	12	5.1	10.7	7	15.4	6.1	12.4	10.9	18.1	13.2	19.8	18.2	27.1	24.1	29.7	20.3	27.8	15.4	25.6	15.6	23.4	10.9	14.7	6.7	14.5
	13	5.5	9.3	5.5	7.7	6.7	18.2	11.8	17.4	10.4	17.3	19	29.1	23.1	28.8	17.7	27.3	18.1	27.6	16	25.6	5.8	11.7	3.4	10
	14	4.9	9.9	4.3	11.6	9.1	16.9	11.9	16.9	12.6	18	20.4	30.1	22	28.6	19.3	27.5	19.9	28.8	14.5	22.8	5.8	10.8	1.7	8.6
	15	1.6	7.6	6.2	14.2	8.2	13.7	8.9	16.7	14.6	20.9	21.2	31.1	18.3	24	20.4	29.5	17.4	26.2	15.5	22.6	8	11.4	5	11.8
	16	1.2	8.7	9.7	16.2	7.9	12.1	9.8	15.2	14.1	22.4	21.9	28	16.9	25.6	21.2	29.3	17.5	22.8	15.9	23.1	8.2	14.3	8	14.4
	17	4.6	8.1	7.7	12.6	5.9	13.1	8.2	16.6	15.1	25.7	20.1	28.9	16.3	24.9	22.4	30.1	16.4	23.3	15.7	24.2	8.2	11.9	9.3	15.9
	18	5	16	7.3	11	10.8	21.2	9.8	18.9	17.5	27.3	19.7	27	18.9	27.9	22.2	28.5	15.9	23.4	15.8	22.8	7.3	14.2	9.2	14.7
	19	6.4	12.2	5.8	8.6	13.4	23.2	10.2	15.7	16.5	26.6	19.4	28.2	19.8	29.1	20.3	29.6	16.7	24.3	15.2	23.3	6.8	14.8	8	15.4
	20	5	10.9	4.4	10.8	11.4	25.2	10.5	15.7	18.3	26.5	19.4	28.8	19.2	27.8	21.3	30.6	17.2	24.7	15.6	21.2	10.6	15.2	11.4	14.9
	21	6.2	12	5.5	11.9	8.7	17.5	6.7	16.1	17.9	24.2	20.2	29.1	19.7	27.9	21.9	28.9	17.5	26.1	15.2	21.8	8.4	14.1	7.1	11.9
	22	8.2	14.3	7.4	12.1	7	13.8	9.4	15	17.3	24.5	20.7	29.3	19.9	28.1	21.2	29.9	18.5	27.4	14.5	18.4	9.1	13.9	6.6	8.2
	23	8.7	14.9	5.7	12.9	6.4	18.9	9.8	15.9	18.3	25.8	18.3	27	20.7	28.1	21.5	29.4	19.2	25.8	14.7	19.5	9.5	13.7	6.8	12.9
	24	1.9	8.8	5.4	8.1	8.9	22	9	18.8	19.1	25	18.3	27.7	20.7	30.2	22.1	31.5	18.6	24.5	13.7	19.2	8.7	13.8	4.4	9.7
	25	0.5	5.4	6.1	12.1	7	10.1	11	21.9	17.7	25.8	19.7	28.8	23.5	32.4	22.2	30.5	19	27.8	10	20.2	7.2	14.5	5.6	10.9
	26	3.5	9.5	2.8	10.5	7.9	16.1	13.7	24.4	17.8	26	22.6	28.9	24.7	31.4	22.6	30.5	13.9	22.9	8.3	15.6	8.3	14.8	1.7	8.3
	27	3.8	10.1	3.4	16.7	12.2	20.7	14.5	25.3	18.3	28.2	21.5	30.3	23.5	30.3	22.5	31.8	13.9	21.2	7.2	14.1	9.1	16.8	1.6	7.2
	28	3.7	8.8	6.7	16.3	9.8	17.9	12.8	22.8	19.7	28.1	22.3	33.9	23.5	30.4	22.4	31.5	15.3	21.8	9.6	19.7	10.6	17.9	1.3	8.3
	29	3.2	5.7			10.3	20.5	13.4	20.4	20.3	25.1	23.8	32.1	23.8	30.3	22.2	32.8	16.7	23.3	13.3	21.4	10.9	14.9	2.3	7.6
	30	2.7	5.4			8.4	14.3	13.5	22.6	16.1	23.4	22.8	30.4	23.3	30.8	23.1	32.8	16.5	24.2	11.6	21.4	10.7	17.1	3.9	8.8
	31	2	7.8			6.9	13.1			16.2	23.9			23.8	31.7	21.2	29.1			13.2	20.4			3.9	5.9

## Sheet: 2019
2019
		January		February		March		April		May		June		July		August		September		October		November		December
		min	max	min	max	min	max	min	max	min	max	min	max	min	max	min	max	min	max	min	max	min	max	min	max
	1	2.4	7.9	8.9	14.9	0.5	4.7	6.6	13.4	15.9	25.6	17.6	26.6	14	25.5	20.9	28.5	21.3	27.5	15.3	24.9	9	13.8	9.5	13.7
	2	1.6	9.5	6.1	10.7	1.8	7	5	8.9	14.8	22.3	19.2	27.2	17.4	25.3	21.2	27.8	20.9	27.1	16.1	24.3	7.5	15.1	3	10.1
	3	8.2	12.7	5.6	11.4	1.7	6.5	5.1	10.2	10.9	16.9	20.3	27.6	19.3	28.3	18.5	27	19.1	26.8	18.6	27.5	7.3	15.4	3.5	8.7
	4	8.1	14.4	6.2	15.3	-0.2	9.5	6.9	11.6	9.2	17.4	20.5	27.1	20.7	27.4	19.8	27	19.9	27.2	18.8	24.9	9.1	18	2.5	9.4
	5	3.1	10.6	8.7	14.1	2.7	13.1	5.2	17.4	11.2	19.3	19.9	28.1	17.2	27.1	16.7	24.1	20	28.7	18.5	27.7	11.6	20	1.7	9.9
	6	4.2	10.7	7.4	16.9	8.5	14.2	12	17.1	14.6	23.8	20.1	27	19.6	27.4	15.2	24.8	16.8	27.1	14.6	22.8	14.3	21.2	3.1	11.2
	7	4.7	9.5	9.3	16.4	5.4	11.9	7.5	19.7	19.7	27.4	20.7	27.8	20.2	27.6	17.2	26.4	16	25.6	11.3	19.1	15.1	24.1	4.2	12.3
	8	2.1	8.2	8.7	11.4	4.3	11.6	12.3	21.1	14.4	26.1	21.4	28.3	19.8	28.2	18.5	26.4	16.8	25.4	13.7	21.4	17.1	24	5.8	13
	9	2.2	6.2	7.3	10.1	5.7	16.8	11	22.7	11.5	17	20.4	27.9	20.1	26.8	19.1	29.3	18.1	26.5	13.7	19	15.2	21.4	6.5	10.6
	10	0.5	10.1	6.6	7.9	8.9	17.5	13.9	22.6	11.1	19.7	20.7	30.9	19.2	28.2	20.7	28.4	19.1	25.8	12	23.5	14.3	22.3	6.4	13.3
	11	7.6	12.8	6.3	11.4	6.5	14.8	13.8	19.9	12.1	20.5	23.6	30.5	20.1	28.4	19.8	29.2	18.7	25.3	14.9	21.4	14.8	22.9	7.2	14.9
	12	5.9	13.3	5.2	14.2	10.4	19	11	17	12.9	18.8	23	29.8	17.9	25.8	19.7	28.6	18.9	25.4	13.2	20.8	13.8	20.5	7.5	16.6
	13	3.9	9.7	8.4	16.3	9.3	17.5	10.8	18.2	13.5	20	21.1	27.2	17.8	25.1	19.7	28.7	18.1	25.7	12.8	20.4	13.4	20.8	8.5	15.2
	14	3.9	10.7	7.1	10.2	7.1	11.3	14.1	22.6	12	21.9	19.4	28.9	15.9	25.8	21.3	31.5	18.3	25.7	14.1	22.2	13.5	21.7	12	16.7
	15	7.5	14	6.2	12.2	7.3	11.1	10.4	19.4	13.4	23.7	21.2	29.8	17.7	22.2	22.5	31.7	18.3	25	14.3	24.1	12.1	22.1	13.2	16.8
	16	2.5	16.3	4.9	10.2	6.5	12.1	10.2	14.3	16	28	21.6	29.6	17.6	24.7	23.8	30	16.8	24.5	14.6	22.5	11.1	17.9	10	14
	17	0	6.9	4.2	7.8	3.6	6.8	7.9	14.7	16.7	29.7	21.1	31.4	17	26.5	20.1	25.4	17.5	22.6	13.9	24.4	9	18	7.7	13.5
	18	0.7	8.7	4.6	6.1	3.6	10.6	9.7	12.6	20	30.4	21.5	30.9	18.4	26.4	20.4	28.2	15.9	23.8	13.7	22.7	10.5	18	7.4	16.2
	19	1.5	8.2	1.2	8.9	4	12.1	8.1	12.9	17	27	21.1	29.3	20.5	25.9	22.1	28.3	17.2	24.3	16.4	22.4	9.9	17	8.7	15.9
	20	4.3	8.5	1.5	9.3	6.3	13.8	7.8	12.6	16.3	20.7	20.9	31	19.4	27.5	22.1	28.2	16.8	24.4	15.5	21.3	10.3	17.6	8.7	14
	21	4.3	12.2	4.1	10.4	6.6	11.2	7.2	12.7	15.3	24.6	21.5	30.8	20.8	26.1	22.5	28.9	10	20.7	14.9	22.4	9.5	13.5	8	18.3
	22	4.1	8.9	4.4	9.5	6.3	11.2	8	14.4	18	24.3	18.4	29.7	20	25.2	23.2	29.6	7.8	18.1	14.6	23.2	8.4	15.2	8.2	16.8
	23	3.5	11.7	6	14.7	3.4	8.3	8.5	14.8	15.7	21.9	22.2	29.6	20.8	25.2	22.8	27.8	10.8	19.8	14.1	21.8	7.6	15.3	14.4	19.3
	24	9.1	14.6	5.5	10.6	0.4	8.8	9.1	15.3	15.5	25.2	20	28.9	21.4	26.3	22.4	26.7	12.8	21	14	21.8	7.2	14.4	15.9	19.7
	25	11.6	15.4	3.9	7.7	1.3	9.4	8.2	15.2	18.5	24.1	22.3	29.2	17.6	24.9	21.4	28.7	15.4	25.7	13.8	21	8.7	15.4	14.8	20.3
	26	10.7	14.8	2.8	4.7	3.3	12.9	8.6	21.1	15.1	21.5	23.8	30.8	17.5	26.1	21.7	28.3	14.9	21.9	14	20.9	8.4	17.3	12.2	18.6
	27	9	15.6	1.6	4.7	5.4	12.3	11.4	20.3	14.2	22.6	23	29	17.8	26.3	21.8	30.1	16.3	23.4	13.3	20.8	12.8	18.9	9.6	14.4
	28	8	13.6	1.4	7.1	3.2	10.2	9.2	20.9	14.8	24	20.1	28.5	19.1	26.2	21	28.4	15.2	21	13.7	20.3	8.1	14	5.5	9.9
	29	5.9	11.1			1.6	9.6	11	20.6	16.3	28.7	19.1	26.4	19.8	27.8	21.5	28.4	14.2	21.8	13.6	20.7	8.1	17.1	6.7	14.5
	30	6.8	17.4			2.1	10.2	13.7	24.2	20.6	28.5	15	24.4	20.2	31.2	21.2	28.6	15.5	22.2	12.8	16.5	8.7	17	7.4	13.7
	31	9.3	16.8			3.8	13.5			18.5	27.7			22.2	28	21.1	27.4			9.8	13.5			7.8	10.4

## Sheet: 2020
2020
		January		February		March		April		May		June		July		August		September		October		November		December
		min	max	min	max	min	max	min	max	min	max	min	max	min	max	min	max	min	max	min	max	min	max	min	max
	1	5.8	9	0.3	9.4	6.2	9.5	7.9	16.6	13.6	23	14.1	23.8	20.5	28.7	22.5	29.8	21.7	31.2	17.5	25.8	12.8	18.9	8.3	15.1
	2	2.2	8.7	3.7	7.2	5.2	10.7	6.8	13.7	12.6	18.6	14.8	22.7	20.7	30	19.3	27.7	23	32.2	15.8	22.1	10.5	17.3	10.2	14
	3	1.9	9.2	5.6	9.6	5.4	16.8	5.4	18.2	12.4	21.5	15.3	21.5	22.1	31.5	18.5	27.5	21.7	30.2	14.4	24.1	11.2	18.5	10	16.2
	4	2.8	12.2	5.1	8.8	10.9	22.6	9.2	14.8	14.4	23.3	15	20.9	23	32.6	19.7	28.2	23.1	35.2	16.6	25.1	12.9	24.2	8.6	15.3
	5	6.4	9.5	3	15.6	14.9	22	8.1	17.1	14.1	21.3	14.7	23.5	22.9	31.2	20.7	28.8	23.6	32.3	16.7	23.9	15.9	21.8	8.2	15.2
	6	4.9	12.4	9.6	18	15.1	23.6	11.3	19.7	13.2	18.9	14.8	26.5	23.4	32.7	20.8	29.6	19.1	27.8	15.7	24.6	14.8	20.8	7.9	14.3
	7	7	11.6	3.8	9.7	12.6	18.2	6.8	15.2	12.6	18.5	19	32.8	23.5	33.9	21.7	29.9	19.1	26.9	15.8	24.5	9.2	15.6	6.4	13.8
	8	9.3	12.3	-1.7	4.1	11.4	18.4	7.9	14.2	10.4	17	24.1	32.1	22.7	31	21.9	30.9	19	27.6	17.2	25.7	6.8	16.6	5.9	14.4
	9	5.1	10.2	-7.2	-0.6	14	25.1	6.6	13.8	9.1	16	18.8	29.6	17.4	28.2	22.8	31.4	19.5	28	16.9	29.9	9.5	17.9	8.2	12.1
	10	3.9	10	-5.7	3.5	17.9	24.7	6.3	14.5	6.4	17.1	19.1	32	20.1	28.4	23.2	31.8	19.8	27.6	18.1	26.9	10.7	16.1	5.9	14.1
	11	3.8	7.4	-2.6	6.2	11.6	23.3	8.9	13.6	9.3	16.7	20.6	30.8	21.1	28.9	22	28.5	20.5	30.3	16.4	24.4	10.2	17.9	6.6	14.6
	12	4.3	6.4	2.6	6.4	8.7	13.8	7.8	13.9	11.4	23	21.3	30.1	21.3	29.8	19.2	28.6	20.8	30.1	15.9	24.3	10.5	16.7	10.8	15.5
	13	1.2	7.6	0.8	7.4	7	21.9	5.4	14.2	17.8	24.4	19.9	25.9	18.7	26.8	20.3	28.8	20.4	29.9	17.2	28	8.6	17.3	10.9	18.6
	14	2.2	9.9	0	7.4	10.6	18.8	7.8	19	13	21.9	19	26.8	17.9	26.5	18.8	27.9	21.4	29.5	20.1	28.7	9.8	16.9	11.5	19.6
	15	3.1	9.8	1.3	10.8	7.6	10.9	10.8	18.1	13.8	24.9	19.1	28.6	18.4	27.9	18.5	27.2	21.7	29.7	18.3	24.5	8.8	15.4	13.1	21
	16	3.2	11	5	12.2	4.6	8	7.4	12.1	19.3	25.6	19.6	29.2	20.4	28.1	19.3	27.7	20.9	28.7	17.1	26	8.8	11.8	12.2	18.6
	17	3.9	11	2.9	11.9	2.7	8.6	6.4	14.2	13.9	22.3	20.5	29.3	20.9	29	20.5	28.4	20.8	28.6	16.6	27.2	7.3	13.5	6.7	12.2
	18	3	8.9	4.2	11.7	1.9	10.3	7.9	19.4	14.9	24.9	19.6	29.3	22	29	19.9	28.4	20.7	27.9	17.3	27.1	5.4	11	6.1	11.7
	19	3.2	10.2	6.5	15.5	5	9.2	7	16.6	12.9	22	17.8	26.1	22.1	28.8	20.3	30.1	18.1	24	15.2	20.7	5.3	8	7	10.2
	20	3.1	10.1	7	12.6	5.7	10.7	9.8	22.4	13.1	23.9	19.2	26.2	22.4	30.4	21.2	30.7	16.6	24.4	11	19.2	5.5	10.6	4.5	8.1
	21	2.8	7.2	6.2	13.2	6.9	10.7	8.9	17.4	18.3	30.7	17.8	25.2	23	29.2	21.4	29	16.2	25.9	11.1	19.6	6	13.4	4.9	7
	22	2.5	5.8	7.3	13.1	5.1	14.4	7.3	13.5	17.9	25.7	18.4	27.2	20.2	27.9	19.5	28.2	19.3	27.7	11.9	21.4	5.4	11.3	4.5	8.9
	23	1.4	4.9	4.4	9.1	6.6	16.1	5.6	14.4	9.5	18.5	19.4	31.2	20.4	28.4	18.1	27.4	19.4	27.9	12.4	21	-0.8	9.5	2.2	6
	24	-1.8	4.3	4.4	9.2	8.2	13.7	6.7	14.6	7.8	18.1	22.1	29.9	21.4	28.9	18.1	28.2	19.5	28.2	13.5	23.8	3.7	12.6	1.7	7.2
	25	-0.1	5.4	2.4	7.6	8	14.1	8	15.8	11.4	17.2	20.9	27.1	21.3	29.4	19	30.4	19.4	28.7	14.7	24.5	4.9	12.2	2.5	10.1
	26	1.5	8	2.1	10.5	8.4	14.2	8.5	16.8	11.4	19.8	19.6	28.3	22.9	31	20.1	28.2	20.5	28.4	17.1	26.3	4.6	10.7	7.3	15
	27	5.2	11.7	8.8	20.1	8.2	19.8	9.4	14.2	13.9	23.5	20.2	27.9	24.9	31	21	28.4	18.4	29.5	16.9	25.8	4.5	13	9.7	17.6
	28	5	14.4	6.5	19.2	12	18.4	7.7	16.2	15.1	24.2	21.1	27.8	22.4	29	20.3	28.5	21.3	28.4	16.7	25.8	6.5	15.6	10.1	18.3
	29	6.9	12.9	3.9	16.1	10	15.7	8.6	19.9	14.1	19.6	21.1	28.7	19.6	29.1	18.9	28.4	20	27.4	18.2	24.9	8.1	16.5	10.9	18.5
	30	7.5	12.2			8.5	11.5	11.1	21.9	14.1	20.6	19.3	28.5	20.9	29.5	20.5	30.3	18.7	27.1	16.1	22	8.5	16	9.8	16.3
	31	1.4	7.5			8.1	13.9			11.9	22.1			21.9	29.2	21.5	31.3			15.5	21.1			9.4	15.8

## Sheet: 2021
2021
		January		February		March		April		May		June		July		August		September		October		November		December
		min	max	min	max	min	max	min	max	min	max	min	max	min	max	min	max	min	max	min	max	min	max	min	max
	1	9.6	17.4	7	15.7	1	9.3	6.9	14.9	11.8	18	15.9	23.7	19.7	28.9	22.1	29.2	22.6	28.8	13.6	17.2	13.1	21.2	5.1	12.5
	2	10.2	17.1	11.4	17.8	2.2	9.8	7.3	10.7	10.7	20.2	15.2	19.3	21.6	29.7	23.3	29.5	20	25.9	13.3	20.8	14.6	20.4	4.1	10.9
	3	7.3	13.3	10.7	18.8	3	6	6.8	12.2	17.1	27.3	15.1	18.6	21.7	31.1	24	30.2	14.3	21.4	14.3	18.5	14.8	20.8	4.6	14.9
	4	8.8	17.4	10.1	17.5	0.3	9	8.4	17.7	14.2	22.2	12.5	16.1	20.2	30	24.5	30.8	14.4	23.3	13	15.5	14	19.6	8.7	17.1
	5	9.4	17	7.7	13.6	2	10.5	10.3	16.6	11.8	18	13	19.8	17.6	21.7	23.9	30.3	15.3	23.4	12.3	17.9	13.7	22	10.3	15.4
	6	8.5	15.1	2.9	10	4.7	15.4	5.5	13.9	10.5	22.5	13.7	19.7	18.5	27.1	23.4	33	17.9	24.8	12.7	18.8	13.8	19.7	9.3	16
	7	7.4	18.3	6.8	9.8	3.9	11	11.5	26	13	18.9	13	20.7	20	27.3	25.7	34.8	17.6	24.1	11.5	19.4	12.2	18.3	12.2	19.8
	8	11.5	16	7.8	16.5	1.1	7.6	11	20.4	12.5	25.3	13.3	22.8	20	27.4	20.7	29.6	17.3	24.6	12.5	20.2	12.3	18	16.6	20.1
	9	13.1	17.5	10.6	19.3	1.4	5.5	6.9	16.6	10.2	22.1	15.6	21.6	21	27.7	20.3	29.3	17.7	25.3	12.4	19.8	13.6	20.6	10	17
	10	9.1	16.6	12.1	19.3	1.7	10.1	6	9.6	5.9	14.1	14.2	22.5	20.4	29	21.1	27.9	18.5	25.6	13.8	21	10.3	18.2	8.5	14.5
	11	6.5	9.1	9.7	16	5.6	14.9	5.3	10	6	13	14.5	22.7	21.6	28.8	19.2	28.1	18.5	23.9	13.8	21.5	6.2	13.1	9.5	18.8
	12	8	12	10.9	19.4	1	6.9	6.7	11.3	8.3	19	15.2	22.3	21.7	28.4	19.4	27.8	17.7	24.5	13.9	20.6	6.9	14.7	11.1	20.1
	13	11.5	22.4	0.6	10.9	1.5	9.4	7.9	12.9	12.6	29.6	16.3	23.4	22.1	28	20.1	25.4	17.3	24.7	14	22.1	7.6	14.8	11.2	16.7
	14	4.9	13.1	0.2	3.6	3.1	12.3	6.9	14	20.6	28.5	16.4	25.3	22.6	28.5	18.7	25.7	17.8	25.1	15	21.2	8.7	16.4	10.3	14.8
	15	4.1	7.9	2	4	8	15.9	9.4	19.4	14.3	26.6	18.1	25.6	21.6	29.1	18.5	26.7	17.1	25.9	15.6	22.1	10.1	16	10.3	18.2
	16	2	7.7	0.2	2	10.7	18.9	10.9	18.9	13.9	29.9	18.4	25.7	21.3	29.4	18.9	27.1	17.1	23.2	15.7	21.6	8.9	16.3	11.3	16.1
	17	4.3	13.3	0	2.3	8.7	15.6	10.9	14.8	15.5	29.2	17.9	24	22.2	31.8	19.4	26.9	16.9	23.1	15.5	21.2	8.5	14.4	7.8	13.8
	18	1.3	6	-0.1	2.1	5.2	13.5	10.1	24.3	14.1	21.1	15.6	24.1	22.1	31.9	21.3	28	15.9	23.8	15	20.3	9	15.7	4.6	9.8
	19	-1.2	3.4	-0.5	1.6	4.9	7.7	12.7	23.2	14.3	20.3	18.4	26.2	22.6	31.8	20.8	27.9	17.1	22	12.3	15.7	8.8	12.5	2.6	9.5
	20	-0.9	3	0	7	3.9	7.2	14.1	23.8	13.2	28.8	20.2	25.8	23.5	31.8	19.7	26.5	16.1	25	8.5	14.7	6.7	12.4	4.5	11.3
	21	-2.5	8	0.6	8	4.5	7.9	10.2	16.3	19.8	28.1	20.2	27.3	24.4	31.4	20	26.4	17.3	24	8.5	16.6	7.8	12.6	3.4	7.6
	22	2.3	9.9	2	7.2	2.5	14.6	9.1	15.2	16.1	23.1	21.1	27	23.4	29.3	19.8	27.6	16.6	19.3	10.4	19.9	7.8	16.9	-3.8	4.3
	23	3.5	11.3	1.8	6.7	8.9	14.6	8.5	15.8	14.3	17.5	21	26.5	19.3	27	22.1	28.2	12.4	17	11.3	19.4	10	16	-4.3	2
	24	3.9	13.3	2.6	7.7	4	8.9	11.4	15	14.6	17.8	20.4	26.7	19.5	27.5	21.4	28.7	11.9	18.8	11.9	18.3	6	14	-3.6	4.8
	25	8.6	15.9	2.8	9.7	3.1	7.2	11.4	15.3	14.2	19.4	21	27.3	20.8	27.8	21.3	28.8	11.6	16.2	8.1	15.9	5.3	11.5	2	7.1
	26	9.3	17.7	3.9	8.5	2.1	10.1	9.4	12.9	14.2	19.5	21.6	27.7	22.1	30.1	22.9	29	10.5	16.2	7.3	15.1	4.9	14.1	5.1	12.1
	27	12.7	16.5	4.7	9.9	2.6	10.3	9	12.7	13.2	21.1	21.2	27.8	19.9	27.4	22.2	29.1	12.6	14.8	7.6	16.9	8.8	16	9.8	11.9
	28	5.4	17.5	3.8	6.7	3.7	10.8	8.6	19	14.5	22	21.1	28.7	19.6	27.7	22.2	31.1	13.4	19.7	9	16.7	10.8	17	10	15
	29	3.8	7.2			3.7	11.6	12.9	23.1	15.6	21.2	21.7	26.8	20.2	28.5	22.1	32.6	14.5	20.4	11.1	17.4	13.5	21.6	8.6	14.7
	30	2.3	10.5			5.2	13.3	14.3	21.9	15.2	17.9	20.2	28	21.1	28.4	24.9	31.5	14.7	21.5	9.9	18	11.3	21.9	7.5	14.3
	31	6.6	11.2			5	14.1			13.4	24.4			20.7	28.6	24.5	28			12	21.4			7.3	12.5
