# Supplementary material for: To Every Thing There Is a Season: Phenology and Photoperiodic Control of Seasonal Development in the Invasive Caucasian Population of the Brown Marmorated Stink Bug, Halyomorpha halys (Hemiptera: Heteroptera: Pentatomidae)
Source: Insects. 2022 Jun 25;13(7):580. doi: 10.3390/insects13070580 (PMC9323183; doi:10.3390/insects13070580)
Supplement: Supplementary file 1 [file insects-13-00580-s001.zip › H_halys-phenology-Suppl_Table_S2.xls]

## Sheet: H_halys_diss_females_means
Table S2. Seasonal changes in numbers of Halyomorpha halys egg batches, nymphs, and adults of different instars per sample during 2018–2021.
		The number of
Date	Egg masses	L1	L2	L3	L4	L5	Adults
2018-05-12	0	0	0	0	0	0	11
2018-05-18	0	0	0	0	0	0	24
2018-05-23	0	0	0	0	0	0	3
2018-06-01	3	0	0	0	0	0	5
2018-06-14	0	30	3	3	0	0	12
2018-06-26	1	0	6	22	0	0	87
2018-07-05	0	0	1	10	2	0	0
2018-07-11	0	0	9	0	8	0	15
2018-07-15	0	0	0	0	3	25	30
2018-07-18	0	0	0	0	0	0	6
2018-07-20	0	0	14	5	0	0	32
2018-07-26	0	0	25	35	14	3	82
2018-08-02	2	26	30	25	12	6	85
2018-08-09	1	0	0	0	12	8	0
2018-08-13	0	0	0	0	24	12	19
2018-08-17	0	0	0	0	18	54	161
2018-08-20	0	0	0	0	0	0	45
2018-08-24	0	0	0	0	0	0	9
2018-08-31	0	0	0	0	0	0	5
2018-09-16	0	0	0	0	0	0	180
2018-09-25	0	0	0	0	0	0	76
2019-05-17	0	0	0	0	0	0	29
2019-05-29	0	0	0	0	0	0	10
2019-06-05	0	0	0	0	0	0	8
2019-06-06	2	0	0	0	0	0	15
2019-06-19	1	34	15	0	0	0	11
2019-06-27	0	0	11	5	0	0	7
2019-07-02	0	0	0	0	15	0	21
2019-07-03	0	0	0	0	0	0	15
2019-07-08	0	0	0	13	24	19	37
2019-07-10	0	0	0	11	9	5	0
2019-07-12	0	0	11	4	21	21	20
2019-07-16	0	0	0	0	0	8	3
2019-07-19	0	0	0	16	1	19	30
2019-07-20	0	0	19	17	23	10	18
2019-08-04	0	0	0	0	0	35	46
2019-08-16	0	0	0	0	0	0	61
2019-08-17	0	0	0	0	0	0	10
2019-08-23	0	0	0	0	0	0	14
2019-09-04	0	0	0	0	0	18	53
2019-09-11	0	0	0	0	0	0	11
2019-09-21	0	0	0	0	0	3	63
2019-09-27	0	0	0	0	0	0	88
2020-05-15	0	0	0	0	0	0	15
2020-05-22	0	0	0	0	0	0	8
2020-05-29	0	0	0	0	0	0	21
2020-06-04	3	0	0	0	0	0	8
2020-06-11	2	26	0	0	0	0	14
2020-06-18	0	0	24	0	0	0	2
2020-06-25	1	0	0	3	2	0	2
2020-07-02	0	0	0	0	25	18	1
2020-07-09	0	0	0	0	2	20	4
2020-07-15	0	0	0	6	0	2	6
2020-07-23	0	0	0	0	0	7	5
2020-07-30	1	0	0	0	0	0	43
2020-08-07	3	24	56	0	0	0	0
2020-08-14	0	0	0	12	3	0	12
2020-08-21	0	0	0	0	16	22	41
2020-08-28	0	0	0	9	2	32	22
2020-09-03	0	0	0	0	0	14	56
2020-09-10	0	0	0	0	0	0	22
2020-09-17	0	0	0	0	0	0	167
2020-09-24	0	0	0	0	0	0	65
2020-09-30	0	0	0	0	0	0	128
2021-05-14	0	0	0	0	0	0	25
2021-05-21	0	0	0	0	0	0	43
2021-05-28	0	0	0	0	0	0	15
2021-06-03	2	0	0	0	0	0	21
2021-06-10	4	0	0	0	0	0	5
2021-06-17	1	28	15	1	0	0	14
2021-06-24	1	0	12	6	0	0	0
2021-07-01	2	0	8	16	4	0	0
2021-07-08	0	0	0	2	18	0	0
2021-07-15	0	0	0	0	6	5	0
2021-07-22	1	0	0	0	0	12	0
2021-07-29	0	0	0	0	3	0	5
2021-08-06	2	0	0	0	0	4	13
2021-08-13	4	0	0	0	0	0	6
2021-08-20	1	30	36	22	0	3	38
2021-08-27	0	0	0	18	2	44	46
2021-09-02	2	0	0	5	8	0	51
2021-09-09	0	0	2	16	0	0	124
2021-09-16	0	0	0	5	0	0	94
2021-09-23	0	0	0	0	0	0	226
2021-09-30	0	0	0	0	0	0	144
