# Supplementary material for: To Every Thing There Is a Season: Phenology and Photoperiodic Control of Seasonal Development in the Invasive Caucasian Population of the Brown Marmorated Stink Bug, Halyomorpha halys (Hemiptera: Heteroptera: Pentatomidae)
Source: Insects. 2022 Jun 25;13(7):580. doi: 10.3390/insects13070580 (PMC9323183; doi:10.3390/insects13070580)
Supplement: Supplementary file 1 [file insects-13-00580-s001.zip › H_halys-phenology-Suppl_Table_S3.xls]

## Sheet: H_halys_diss_females_means
Table S3. Seasonal changes in the proportions of Halyomorpha halys females with different states of the ovaries during 2018–2021. Each symbol corresponds to one sample of field-collected females (6–35 females per sample with a total of 1180 females in 85 samples).
	The percentage of females with the ovaries
Date	Not developed	Partly developed	Fully developed
2018-06-14	38.4615	53.8462	7.69231
2018-06-21	50	21.4286	28.5714
2018-06-28	18.1818	27.2727	54.5455
2018-07-05	52.6316	21.0526	26.3158
2018-07-19	69.2308	7.69231	23.0769
2018-07-26	81.8182	9.09091	9.09091
2018-08-09	50	0	50
2018-08-16	42.8571	0	57.1429
2018-08-23	100	0	0
2018-08-28	100	0	0
2018-09-04	100	0	0
2018-09-11	100	0	0
2018-09-18	100	0	0
2018-09-25	100	0	0
2018-10-03	100	0	0
2018-10-09	100	0	0
2018-10-16	100	0	0
2018-11-07	93.3333	6.66667	0
2018-11-16	100	0	0
2018-12-05	100	0	0
2019-03-18	100	0	0
2019-03-28	100	0	0
2019-04-10	100	0	0
2019-04-20	100	0	0
2019-05-20	100	0	0
2019-07-08	13.3333	33.3333	53.3333
2019-07-16	26.6667	26.6667	46.6667
2019-07-23	26.6667	33.3333	40
2019-08-05	6.66667	20	73.3333
2019-08-19	100	0	0
2019-08-26	73.3333	26.6667	0
2019-09-03	100	0	0
2019-09-17	100	0	0
2019-09-30	100	0	0
2019-10-07	100	0	0
2019-10-22	100	0	0
2019-11-06	100	0	0
2019-11-18	100	0	0
2020-02-13	100	0	0
2020-02-21	100	0	0
2020-03-04	100	0	0
2020-03-13	100	0	0
2020-03-23	100	0	0
2020-04-09	100	0	0
2020-04-23	100	0	0
2020-04-30	100	0	0
2020-05-15	100	0	0
2020-05-21	100	0	0
2020-05-28	100	0	0
2020-06-04	100	0	0
2020-06-15	93.75	6.25	0
2020-06-22	33.3333	33.3333	33.3333
2020-06-29	33.3333	33.3333	33.3333
2020-07-06	66.6667	0	33.3333
2020-07-13	16.6667	58.3333	25
2020-07-20	46.1538	38.4615	15.3846
2020-07-27	63.6364	27.2727	9.09091
2020-08-03	50	10	40
2020-08-10	44.4444	22.2222	33.3333
2020-08-17	91.6667	0	8.33333
2020-08-24	66.6667	25	8.33333
2020-08-31	100	0	0
2020-09-07	100	0	0
2020-09-14	100	0	0
2020-09-21	100	0	0
2020-09-28	100	0	0
2020-10-06	100	0	0
2020-10-12	100	0	0
2020-10-19	100	0	0
2020-10-26	100	0	0
2020-11-02	100	0	0
2020-11-09	100	0	0
2020-11-16	100	0	0
2020-11-30	100	0	0
2020-12-14	100	0	0
2020-12-28	100	0	0
2021-01-11	100	0	0
2021-01-25	100	0	0
2021-03-15	100	0	0
2021-03-22	100	0	0
2021-04-19	100	0	0
2021-04-30	100	0	0
2021-05-10	100	0	0
2021-05-17	100	0	0
2021-05-24	100	0	0
2021-06-07	100	0	0
