# Supplementary material for: To Every Thing There Is a Season: Phenology and Photoperiodic Control of Seasonal Development in the Invasive Caucasian Population of the Brown Marmorated Stink Bug, Halyomorpha halys (Hemiptera: Heteroptera: Pentatomidae)
Source: Insects. 2022 Jun 25;13(7):580. doi: 10.3390/insects13070580 (PMC9323183; doi:10.3390/insects13070580)
Supplement: Supplementary file 1 [file insects-13-00580-s001.zip › H_halys-phenology-Suppl_Table_S4.xls]

## Sheet: H_halys_diss_females_means
Suppl. Table S4. Seasonal changes in the proportions of Halyomorpha halys females with different filling states of the spermatheca during 2018–2021. Each symbol corresponds to one sample of field-collected females (6–35 females per sample with a total of 1180 females in 85 samples).
	The percentage of females with the spermatheca:
Date	Empty	Partly filled	Full
2018-06-14	53.8462	23.0769	23.0769
2018-06-21	78.5714	7.14286	14.2857
2018-06-28	45.4545	45.4545	9.09091
2018-07-05	63.1579	21.0526	15.7895
2018-07-19	69.2308	15.3846	15.3846
2018-07-26	81.8182	9.09091	9.09091
2018-08-09	50	16.6667	33.3333
2018-08-16	42.8571	42.8571	14.2857
2018-08-23	100	0	0
2018-08-28	100	0	0
2018-09-04	100	0	0
2018-09-11	100	0	0
2018-09-18	100	0	0
2018-09-25	100	0	0
2018-10-03	100	0	0
2018-10-09	100	0	0
2018-10-16	100	0	0
2018-11-07	93.3333	6.66667	0
2018-11-16	100	0	0
2018-12-05	100	0	0
2019-03-18	100	0	0
2019-03-28	100	0	0
2019-04-10	100	0	0
2019-04-20	100	0	0
2019-05-20	100	0	0
2019-07-08	0	40	60
2019-07-16	13.3333	40	46.6667
2019-07-23	26.6667	33.3333	40
2019-08-05	6.66667	13.3333	80
2019-08-19	100	0	0
2019-08-26	73.3333	26.6667	0
2019-09-03	100	0	0
2019-09-17	100	0	0
2019-09-30	100	0	0
2019-10-07	100	0	0
2019-10-22	100	0	0
2019-11-06	100	0	0
2019-11-18	100	0	0
2020-02-13	100	0	0
2020-02-21	100	0	0
2020-03-04	100	0	0
2020-03-13	100	0	0
2020-03-23	100	0	0
2020-04-09	100	0	0
2020-04-23	100	0	0
2020-04-30	100	0	0
2020-05-15	100	0	0
2020-05-21	100	0	0
2020-05-28	100	0	0
2020-06-04	100	0	0
2020-06-15	93.75	6.25	0
2020-06-22	50	41.6667	8.33333
2020-06-29	58.3333	25	16.6667
2020-07-06	75	16.6667	8.33333
2020-07-13	41.6667	25	33.3333
2020-07-20	53.8462	15.3846	30.7692
2020-07-27	81.8182	9.09091	9.09091
2020-08-03	50	30	20
2020-08-10	55.5556	33.3333	11.1111
2020-08-17	91.6667	8.33333	0
2020-08-24	91.6667	0	8.33333
2020-08-31	100	0	0
2020-09-07	100	0	0
2020-09-14	100	0	0
2020-09-21	100	0	0
2020-09-28	100	0	0
2020-10-06	100	0	0
2020-10-12	100	0	0
2020-10-19	100	0	0
2020-10-26	100	0	0
2020-11-02	100	0	0
2020-11-09	100	0	0
2020-11-16	100	0	0
2020-11-30	100	0	0
2020-12-14	100	0	0
2020-12-28	100	0	0
2021-01-11	100	0	0
2021-01-25	100	0	0
2021-03-15	100	0	0
2021-03-22	100	0	0
2021-04-19	100	0	0
2021-04-30	100	0	0
2021-05-10	100	0	0
2021-05-17	100	0	0
2021-05-24	100	0	0
2021-06-07	100	0	0
