# Supplementary material for: To Every Thing There Is a Season: Phenology and Photoperiodic Control of Seasonal Development in the Invasive Caucasian Population of the Brown Marmorated Stink Bug, Halyomorpha halys (Hemiptera: Heteroptera: Pentatomidae)
Source: Insects. 2022 Jun 25;13(7):580. doi: 10.3390/insects13070580 (PMC9323183; doi:10.3390/insects13070580)
Supplement: Supplementary file 1 [file insects-13-00580-s001.zip › H_halys-phenology-Suppl_Table_S5.xls]

## Sheet: H_halys_diss_females_means
Suppl. Table S5. Seasonal changes in the proportions of Halyomorpha halys males with different states of the ectodermal sac during 2018–2021. Each symbol corresponds to one sample of field-collected males (3–29 males per sample with a total of 1154 males in 85 samples).
	The percentage of males with the ectodermal sac:
Date	Empty	Partly filled	Full
2018-06-14	20	20	60
2018-06-21	0	66.6667	33.3333
2018-06-28	20	40	40
2018-07-05	28.5714	42.8571	28.5714
2018-07-19	16.6667	33.3333	50
2018-07-26	40	25	35
2018-08-09	54.5455	9.09091	36.3636
2018-08-16	23.0769	61.5385	15.3846
2018-08-23	94.7368	5.26316	0
2018-08-28	90	10	0
2018-09-04	100	0	0
2018-09-11	100	0	0
2018-09-18	95	5	0
2018-09-25	100	0	0
2018-10-03	86.3636	13.6364	0
2018-10-09	100	0	0
2018-10-16	100	0	0
2018-11-07	100	0	0
2018-11-16	100	0	0
2018-12-05	100	0	0
2019-03-18	100	0	0
2019-03-28	100	0	0
2019-04-10	100	0	0
2019-04-20	100	0	0
2019-05-20	100	0	0
2019-07-08	20	46.6667	33.3333
2019-07-16	40	46.6667	13.3333
2019-07-23	66.6667	33.3333	0
2019-08-05	20	46.6667	33.3333
2019-08-19	100	0	0
2019-08-26	86.6667	13.3333	0
2019-09-03	100	0	0
2019-09-17	100	0	0
2019-09-30	100	0	0
2019-10-07	100	0	0
2019-10-22	100	0	0
2019-11-06	100	0	0
2019-11-18	100	0	0
2020-02-13	100	0	0
2020-02-21	100	0	0
2020-03-04	100	0	0
2020-03-13	100	0	0
2020-03-23	100	0	0
2020-04-09	100	0	0
2020-04-23	100	0	0
2020-04-30	100	0	0
2020-05-15	100	0	0
2020-05-21	100	0	0
2020-05-28	100	0	0
2020-06-04	100	0	0
2020-06-15	76.9231	23.0769	0
2020-06-22	50	41.6667	8.33333
2020-06-29	25	66.6667	8.33333
2020-07-06	30.7692	46.1538	23.0769
2020-07-13	0	60	40
2020-07-20	28.5714	35.7143	35.7143
2020-07-27	14.2857	35.7143	50
2020-08-03	40	13.3333	46.6667
2020-08-10	63.6364	9.09091	27.2727
2020-08-17	80	10	10
2020-08-24	100	0	0
2020-08-31	100	0	0
2020-09-07	92.3077	7.69231	0
2020-09-14	100	0	0
2020-09-21	100	0	0
2020-09-28	100	0	0
2020-10-06	100	0	0
2020-10-12	100	0	0
2020-10-19	100	0	0
2020-10-26	100	0	0
2020-11-02	100	0	0
2020-11-09	100	0	0
2020-11-16	100	0	0
2020-11-30	100	0	0
2020-12-14	100	0	0
2020-12-28
2021-01-11	100	0	0
2021-01-25	100	0	0
2021-03-15	100	0	0
2021-03-22	100	0	0
2021-04-19	100	0	0
2021-04-30	100	0	0
2021-05-10	100	0	0
2021-05-17	100	0	0
2021-05-24	100	0	0
2021-06-07	100	0	0
