# Supplementary material for: To Every Thing There Is a Season: Phenology and Photoperiodic Control of Seasonal Development in the Invasive Caucasian Population of the Brown Marmorated Stink Bug, Halyomorpha halys (Hemiptera: Heteroptera: Pentatomidae)
Source: Insects. 2022 Jun 25;13(7):580. doi: 10.3390/insects13070580 (PMC9323183; doi:10.3390/insects13070580)
Supplement: Supplementary file 1 [file insects-13-00580-s001.zip › H_halys-phenology-Suppl_Table_S6.xls]

## Sheet: H_halys_diss_females_means
Suppl. Table S6. Seasonal changes in the proportions of Halyomorpha halys females with different states of fat body during 2018–2021. Each symbol corresponds to one sample of field-collected females (6–35 females per sample with a total of 1180 females in 85 samples).
	The percentage of females with the fat body
Date	Not developed	Partly developed	Fully developed
2018-06-14	38.4615	38.4615	23.0769
2018-06-21	28.5714	64.2857	7.14286
2018-06-28	18.1818	27.2727	54.5455
2018-07-05	10.5263	21.0526	68.4211
2018-07-19	30.7692	15.3846	53.8462
2018-07-26	36.3636	27.2727	36.3636
2018-08-09	50	33.3333	16.6667
2018-08-16	71.4286	14.2857	14.2857
2018-08-23	25	20	55
2018-08-28	25	37.5	37.5
2018-09-04	4.7619	23.8095	71.4286
2018-09-11	34.7826	34.7826	30.4348
2018-09-18	25	45	30
2018-09-25	34.2857	25.7143	40
2018-10-03	45.4545	36.3636	18.1818
2018-10-09	100	0	0
2018-10-16	50	50	0
2018-11-07	13.3333	46.6667	40
2018-11-16	6.66667	46.6667	46.6667
2018-12-05	20	26.6667	53.3333
2019-03-18	0	0	100
2019-03-28	0	60	40
2019-04-10	0	33.3333	66.6667
2019-04-20	0	73.3333	26.6667
2019-05-20	33.3333	66.6667	0
2019-07-08	13.3333	80	6.66667
2019-07-16	20	80	0
2019-07-23	6.66667	86.6667	6.66667
2019-08-05	33.3333	66.6667	0
2019-08-19	0	60	40
2019-08-26	26.6667	73.3333	0
2019-09-03	46.6667	46.6667	6.66667
2019-09-17	20	60	20
2019-09-30	20	60	20
2019-10-07	13.3333	66.6667	20
2019-10-22	6.66667	26.6667	66.6667
2019-11-06	0	13.3333	86.6667
2019-11-18	0	13.3333	86.6667
2020-02-13	0	20	80
2020-02-21	0	6.66667	93.3333
2020-03-04	0	6.66667	93.3333
2020-03-13	0	13.3333	86.6667
2020-03-23	0	53.3333	46.6667
2020-04-09	0	50	50
2020-04-23	6.66667	46.6667	46.6667
2020-04-30	13.3333	53.3333	33.3333
2020-05-15	20	53.3333	26.6667
2020-05-21	20	66.6667	13.3333
2020-05-28	26.6667	53.3333	20
2020-06-04	33.3333	53.3333	13.3333
2020-06-15	25	75	0
2020-06-22	16.6667	66.6667	16.6667
2020-06-29	16.6667	58.3333	25
2020-07-06	8.33333	66.6667	25
2020-07-13	33.3333	58.3333	8.33333
2020-07-20	53.8462	30.7692	15.3846
2020-07-27	72.7273	27.2727	0
2020-08-03	30	40	30
2020-08-10	44.4444	33.3333	22.2222
2020-08-17	25	33.3333	41.6667
2020-08-24	58.3333	33.3333	8.33333
2020-08-31	38.4615	38.4615	23.0769
2020-09-07	33.3333	25	41.6667
2020-09-14	25	33.3333	41.6667
2020-09-21	10	60	30
2020-09-28	16.6667	41.6667	41.6667
2020-10-06	0	0	100
2020-10-12	0	16.6667	83.3333
2020-10-19	0	25	75
2020-10-26	0	16.6667	83.3333
2020-11-02	0	18.1818	81.8182
2020-11-09	0	8.33333	91.6667
2020-11-16	0	0	100
2020-11-30	0	25	75
2020-12-14	0	25	75
2020-12-28	0	25	75
2021-01-11	0	8.33333	91.6667
2021-01-25	0	16.6667	83.3333
2021-03-15	0	8.33333	91.6667
2021-03-22	0	16.6667	83.3333
2021-04-19	0	41.6667	58.3333
2021-04-30	0	66.6667	33.3333
2021-05-10	16.6667	50	33.3333
2021-05-17	33.3333	66.6667	0
2021-05-24	33.3333	66.6667	0
2021-06-07	8.33333	50	41.6667
