# Supplementary material for: To Every Thing There Is a Season: Phenology and Photoperiodic Control of Seasonal Development in the Invasive Caucasian Population of the Brown Marmorated Stink Bug, Halyomorpha halys (Hemiptera: Heteroptera: Pentatomidae)
Source: Insects. 2022 Jun 25;13(7):580. doi: 10.3390/insects13070580 (PMC9323183; doi:10.3390/insects13070580)
Supplement: Supplementary file 1 [file insects-13-00580-s001.zip › H_halys-phenology-Suppl_Table_S7.xls]

## Sheet: H_halys_diss_females_means
Suppl. Table S7. Seasonal changes in the proportions of Halyomorpha halys males with different states of fat body during 2018–2021. Each symbol corresponds to one sample of field-collected males (3–29 males per sample with a total of 1154 males in 85 samples).
	The percentage of males with the fat body
Date	Not developed	Partly developed	Fully developed
2018-06-14	40	40	20
2018-06-21	66.6667	33.3333	0
2018-06-28	20	40	40
2018-07-05	0	57.1429	42.8571
2018-07-19	0	66.6667	33.3333
2018-07-26	15	25	60
2018-08-09	36.3636	18.1818	45.4545
2018-08-16	69.2308	7.69231	23.0769
2018-08-23	42.1053	15.7895	42.1053
2018-08-28	30	20	50
2018-09-04	5.26316	47.3684	47.3684
2018-09-11	52.9412	41.1765	5.88235
2018-09-18	35	15	50
2018-09-25	17.2414	24.1379	58.6207
2018-10-03	54.5455	22.7273	22.7273
2018-10-09	83.3333	16.6667	0
2018-10-16	40	33.3333	26.6667
2018-11-07	40	40	20
2018-11-16	13.3333	46.6667	40
2018-12-05	33.3333	20	46.6667
2019-03-18	0	86.6667	13.3333
2019-03-28	13.3333	73.3333	13.3333
2019-04-10	0	53.3333	46.6667
2019-04-20	13.3333	73.3333	13.3333
2019-05-20	60	40	0
2019-07-08	13.3333	86.6667	0
2019-07-16	33.3333	66.6667	0
2019-07-23	26.6667	73.3333	0
2019-08-05	20	80	0
2019-08-19	18.1818	81.8182	0
2019-08-26	33.3333	66.6667	0
2019-09-03	60	40	0
2019-09-17	13.3333	53.3333	33.3333
2019-09-30	20	66.6667	13.3333
2019-10-07	0	60	40
2019-10-22	0	26.6667	73.3333
2019-11-06	0	13.3333	86.6667
2019-11-18	0	40	60
2020-02-13	6.66667	40	53.3333
2020-02-21	0	53.3333	46.6667
2020-03-04	0	66.6667	33.3333
2020-03-13	0	60	40
2020-03-23	0	46.6667	53.3333
2020-04-09	0	50	50
2020-04-23	6.66667	53.3333	40
2020-04-30	6.66667	60	33.3333
2020-05-15	53.3333	40	6.66667
2020-05-21	40	53.3333	6.66667
2020-05-28	46.6667	53.3333	0
2020-06-04	0	26.6667	73.3333
2020-06-15	38.4615	30.7692	30.7692
2020-06-22	58.3333	33.3333	8.33333
2020-06-29	58.3333	33.3333	8.33333
2020-07-06	53.8462	38.4615	7.69231
2020-07-13	50	30	20
2020-07-20	50	42.8571	7.14286
2020-07-27	28.5714	42.8571	28.5714
2020-08-03	20	40	40
2020-08-10	36.3636	45.4545	18.1818
2020-08-17	50	20	30
2020-08-24	33.3333	33.3333	33.3333
2020-08-31	27.2727	27.2727	45.4545
2020-09-07	30.7692	23.0769	46.1538
2020-09-14	23.0769	38.4615	38.4615
2020-09-21	0	33.3333	66.6667
2020-09-28	8.33333	58.3333	33.3333
2020-10-06	0	33.3333	66.6667
2020-10-12	0	25	75
2020-10-19	0	50	50
2020-10-26	0	33.3333	66.6667
2020-11-02	0	41.6667	58.3333
2020-11-09	0	25	75
2020-11-16	0	50	50
2020-11-30	0	33.3333	66.6667
2020-12-14	0	41.6667	58.3333
2020-12-28
2021-01-11	0	50	50
2021-01-25	0	66.6667	33.3333
2021-03-15	0	33.3333	66.6667
2021-03-22	0	25	75
2021-04-19	0	50	50
2021-04-30	0	91.6667	8.33333
2021-05-10	33.3333	66.6667	0
2021-05-17	41.6667	58.3333	0
2021-05-24	41.6667	58.3333	0
2021-06-07	25	25	50
