# Supplementary material for: To Every Thing There Is a Season: Phenology and Photoperiodic Control of Seasonal Development in the Invasive Caucasian Population of the Brown Marmorated Stink Bug, Halyomorpha halys (Hemiptera: Heteroptera: Pentatomidae)
Source: Insects. 2022 Jun 25;13(7):580. doi: 10.3390/insects13070580 (PMC9323183; doi:10.3390/insects13070580)
Supplement: Supplementary file 1 [file insects-13-00580-s001.zip › H_halys-phenology-Suppl_Table_S8.xls]

## Sheet: 2018
		Suppl. Table S8. Seasonal dynamics of the accumulation of the sum of effective temperatures (SET) with the lower developmental threshold of 13.3°C, seasonal changes in numbers of Halyomorpha halys egg batches and the 1st instar nymphs per sample during 2018–2021 plotted against the accumulated SET
				daily mean			effective (above 13.3)					total SET
		data	2018	2019	2020	2021	2018	2019	2020	2021	2018	2019	2020	2021
1	2022-01-01	2022-01-02	8.9	4.1	7.3	13.3	0	0	0	0	0	0	0	0
2	2022-01-01	2022-01-03	7.3	4.8	4.7	12.8	0	0	0	0	0	0	0	0
3	2022-01-01	2022-01-04	7.1	10.5	4.3	9.9	0	0	0	0	0	0	0	0
4	2022-01-01	2022-01-05	11.3	10.6	6.4	12.2	0	0	0	0	0	0	0	0
5	2022-01-01	2022-01-06	12.6	4.8	7.5	12.9	0	0	0	0	0	0	0	0
6	2022-01-01	2022-01-07	10.5	6.9	7.6	12.1	0	0	0	0	0	0	0	0
7	2022-01-01	2022-01-08	8.2	6.7	9.6	11.5	0	0	0	0	0	0	0	0
8	2022-01-01	2022-01-09	9.6	4.7	11.3	13.8	0	0	0	0.5	0	0	0	0.5
9	2022-01-01	2022-01-10	7.9	3.8	7.6	15.8	0	0	0	2.5	0	0	0	3
10	2022-01-01	2022-01-11	2.8	4	5.4	12.9	0	0	0	0	0	0	0	3
11	2022-01-01	2022-01-12	5.3	10.4	5.3	7.7	0	0	0	0	0	0	0	3
12	2022-01-01	2022-01-13	8.9	8.9	5.1	9.5	0	0	0	0	0	0	0	3
13	2022-01-01	2022-01-14	7.6	6.3	3.9	18.3	0	0	0	5	0	0	0	8
14	2022-01-01	2022-01-15	6.8	6.9	5.6	7.7	0	0	0	0	0	0	0	8
15	2022-01-01	2022-01-16	3.8	10.9	5.9	6.3	0	0	0	0	0	0	0	8
16	2022-01-01	2022-01-17	4.1	9.3	6.3	3.9	0	0	0	0	0	0	0	8
17	2022-01-01	2022-01-18	6.2	3.2	7.1	7.5	0	0	0	0	0	0	0	8
18	2022-01-01	2022-01-19	9.2	3.6	5.7	2.7	0	0	0	0	0	0	0	8
19	2022-01-01	2022-01-20	8.6	4.3	5.7	0.7	0	0	0	0	0	0	0	8
20	2022-01-01	2022-01-21	7.2	6	6	0.2	0	0	0	0	0	0	0	8
21	2022-01-01	2022-01-22	9	7.6	4.1	0.8	0	0	0	0	0	0	0	8
22	2022-01-01	2022-01-23	11.5	5.9	3.8	5.5	0	0	0	0	0	0	0	8
23	2022-01-01	2022-01-24	12.7	6.5	3.4	6.6	0	0	0	0	0	0	0	8
24	2022-01-01	2022-01-25	3.8	11.7	1	7.6	0	0	0	0	0	0	0	8
25	2022-01-01	2022-01-26	2.6	13.6	2.9	11.9	0	0.3	0	0	0	0.3	0	8
26	2022-01-01	2022-01-27	5.4	12.4	4.1	13.6	0	0	0	0.3	0	0.3	0	8.3
27	2022-01-01	2022-01-28	6.6	13.4	7.3	15.4	0	0.1	0	2.1	0	0.4	0	10.4
28	2022-01-01	2022-01-29	5.5	9.7	9.5	12.8	0	0	0	0	0	0.4	0	10.4
29	2022-01-01	2022-01-30	4.2	8.4	8.2	4.8	0	0	0	0	0	0.4	0	10.4
30	2022-01-01	2022-01-31	3.9	10.6	10.1	5.5	0	0	0	0	0	0.4	0	10.4
31	2022-01-01	2022-02-01	5.4	12.4	5.3	9	0	0	0	0	0	0.4	0	10.4
32	2022-01-01	2022-02-02	4	12.2	3.9	10.8	0	0	0	0	0	0.4	0	10.4
33	2022-01-01	2022-02-03	7.1	8	5.6	13.8	0	0	0	0.5	0	0.4	0	10.9
34	2022-01-01	2022-02-04	10.9	8.4	7.5	13.7	0	0	0	0.4	0	0.4	0	11.3
35	2022-01-01	2022-02-05	12.7	9.6	7.3	12.8	0	0	0	0	0	0.4	0	11.3
36	2022-01-01	2022-02-06	10.6	10.9	8.5	9.8	0	0	0	0	0	0.4	0	11.3
37	2022-01-01	2022-02-07	6.6	12.2	15.3	6.4	0	0	2	0	0	0.4	2	11.3
38	2022-01-01	2022-02-08	8.3	13.2	6.9	8.3	0	0	0	0	0	0.4	2	11.3
39	2022-01-01	2022-02-09	10.9	9.8	0.7	10.9	0	0	0	0	0	0.4	2	11.3
40	2022-01-01	2022-02-10	10.1	8.3	-4.1	15.5	0	0	0	2.2	0	0.4	2	13.5
41	2022-01-01	2022-02-11	7.9	7.2	-1.9	15.6	0	0	0	2.3	0	0.4	2	15.8
42	2022-01-01	2022-02-12	11.8	7.7	1.1	13	0	0	0	0	0	0.4	2	15.8
43	2022-01-01	2022-02-13	10	8.9	4.9	14.8	0	0	0	1.5	0	0.4	2	17.3
44	2022-01-01	2022-02-14	6.4	10.7	4	2.8	0	0	0	0	0	0.4	2	17.3
45	2022-01-01	2022-02-15	6.9	8.1	2.6	1.6	0	0	0	0	0	0.4	2	17.3
46	2022-01-01	2022-02-16	10.2	8.2	5.3	3	0	0	0	0	0	0.4	2	17.3
47	2022-01-01	2022-02-17	12.8	7.1	7.5	0.7	0	0	0	0	0	0.4	2	17.3
48	2022-01-01	2022-02-18	10.6	5.6	6.4	0.8	0	0	0	0	0	0.4	2	17.3
49	2022-01-01	2022-02-19	8.9	5.1	7.2	0.7	0	0	0	0	0	0.4	2	17.3
50	2022-01-01	2022-02-20	6.7	4.8	10.6	0.3	0	0	0	0	0	0.4	2	17.3
51	2022-01-01	2022-02-21	6.7	4.9	8.8	2.6	0	0	0	0	0	0.4	2	17.3
52	2022-01-01	2022-02-22	7.9	6.9	9.2	4	0	0	0	0	0	0.4	2	17.3
53	2022-01-01	2022-02-23	9.7	6.8	9.4	4.1	0	0	0	0	0	0.4	2	17.3
54	2022-01-01	2022-02-24	8.3	9.7	6.3	4.3	0	0	0	0	0	0.4	2	17.3
55	2022-01-01	2022-02-25	6.6	7.2	6.7	4.8	0	0	0	0	0	0.4	2	17.3
56	2022-01-01	2022-02-26	8.5	4.7	5.2	5.2	0	0	0	0	0	0.4	2	17.3
57	2022-01-01	2022-02-27	5.7	3.8	5.8	5.8	0	0	0	0	0	0.4	2	17.3
58	2022-01-01	2022-02-28	8.1	3.4	14.9	6.5	0	0	1.6	0	0	0.4	3.6	17.3
59	2022-01-01	2022-03-01	10.9	3.6	12.7	5.3	0	0	0	0	0	0.4	3.6	17.3
60	2022-01-01	2022-03-02	6.6	2.5	8.9	4.4	0	0	0	0	0	0.4	3.6	17.3
61	2022-01-01	2022-03-03	3.6	3.5	7.4	5	0	0	0	0	0	0.4	3.6	17.3
62	2022-01-01	2022-03-04	10.9	3.3	7.7	4.1	0	0	0	0	0	0.4	3.6	17.3
63	2022-01-01	2022-03-05	10.7	3.9	10.5	4.1	0	0	0	0	0	0.4	3.6	17.3
64	2022-01-01	2022-03-06	6.9	7.4	15.9	5.8	0	0	2.6	0	0	0.4	6.2	17.3
65	2022-01-01	2022-03-07	7.3	12.1	18.1	9.6	0	0	4.8	0	0	0.4	11	17.3
66	2022-01-01	2022-03-08	14.4	8.1	18.3	6.6	1.1	0	5	0	1.1	0.4	16	17.3
67	2022-01-01	2022-03-09	11.9	7.3	15.5	3.6	0	0	2.2	0	1.1	0.4	18.2	17.3
68	2022-01-01	2022-03-10	10.2	10.2	15.1	2.8	0	0	1.8	0	1.1	0.4	20	17.3
69	2022-01-01	2022-03-11	6.3	12.1	19.1	5	0	0	5.8	0	1.1	0.4	25.8	17.3
70	2022-01-01	2022-03-12	7.2	10.4	20.9	8.1	0	0	7.6	0	1.1	0.4	33.4	17.3
71	2022-01-01	2022-03-13	9.3	14.6	15.2	3.5	0	1.3	1.9	0	1.1	1.7	35.3	17.3
72	2022-01-01	2022-03-14	12.1	11.3	10.8	4.5	0	0	0	0	1.1	1.7	35.3	17.3
73	2022-01-01	2022-03-15	11.9	8.3	12.5	7.6	0	0	0	0	1.1	1.7	35.3	17.3
74	2022-01-01	2022-03-16	10	8.4	13.8	11.1	0	0	0.5	0	1.1	1.7	35.8	17.3
75	2022-01-01	2022-03-17	9.6	7.5	8.8	14.3	0	0	0	1	1.1	1.7	35.8	18.3
76	2022-01-01	2022-03-18	9.6	5.5	6	11.7	0	0	0	0	1.1	1.7	35.8	18.3
77	2022-01-01	2022-03-19	16.3	6.6	4.3	8.5	3	0	0	0	4.1	1.7	35.8	18.3
78	2022-01-01	2022-03-20	18.7	7.6	4.5	6.4	5.4	0	0	0	9.5	1.7	35.8	18.3
79	2022-01-01	2022-03-21	17.2	9.2	6.6	5.5	3.9	0	0	0	13.4	1.7	35.8	18.3
80	2022-01-01	2022-03-22	11.7	8	7.3	6.2	0	0	0	0	13.4	1.7	35.8	18.3
81	2022-01-01	2022-03-23	10.2	8.1	8.4	6.7	0	0	0	0	13.4	1.7	35.8	18.3
82	2022-01-01	2022-03-24	11.2	5.5	9.2	10.9	0	0	0	0	13.4	1.7	35.8	18.3
83	2022-01-01	2022-03-25	13.9	4.3	10.7	5.6	0.6	0	0	0	14	1.7	35.8	18.3
84	2022-01-01	2022-03-26	8.2	4.9	11	4.5	0	0	0	0	14	1.7	35.8	18.3
85	2022-01-01	2022-03-27	11.1	7.5	10	4.8	0	0	0	0	14	1.7	35.8	18.3
86	2022-01-01	2022-03-28	15.4	8.5	10.7	5.9	2.1	0	0	0	16.1	1.7	35.8	18.3
87	2022-01-01	2022-03-29	12.7	7.1	14.3	6.7	0	0	1	0	16.1	1.7	36.8	18.3
88	2022-01-01	2022-03-30	15.4	4.9	16.1	7.1	2.1	0	2.8	0	18.2	1.7	39.6	18.3
89	2022-01-01	2022-03-31	10.1	5.7	11.4	8.9	0	0	0	0	18.2	1.7	39.6	18.3
90	2022-01-01	2022-04-01	8.6	8.3	9.5	10	0	0	0	0	18.2	1.7	39.6	18.3
91	2022-01-01	2022-04-02	13.3	9.4	10.2	10.6	0	0	0	0	18.2	1.7	39.6	18.3
92	2022-01-01	2022-04-03	17.5	6.9	11.4	8.2	4.2	0	0	0	22.4	1.7	39.6	18.3
93	2022-01-01	2022-04-04	8.9	7.2	10.1	8.6	0	0	0	0	22.4	1.7	39.6	18.3
94	2022-01-01	2022-04-05	9.4	8.5	10.5	12.7	0	0	0	0	22.4	1.7	39.6	18.3
95	2022-01-01	2022-04-06	10.7	10.2	11	12.6	0	0	0	0	22.4	1.7	39.6	18.3
96	2022-01-01	2022-04-07	14.6	14.5	12.1	9.3	1.3	1.2	0	0	23.7	2.9	39.6	18.3
97	2022-01-01	2022-04-08	16.7	13.7	14.4	18.9	3.4	0.4	1.1	5.6	27.1	3.3	40.7	23.9
98	2022-01-01	2022-04-09	17.1	16.5	11	16.4	3.8	3.2	0	3.1	30.9	6.5	40.7	27
99	2022-01-01	2022-04-10	16.8	17.5	10.4	10.3	3.5	4.2	0	0	34.4	10.7	40.7	27
100	2022-01-01	2022-04-11	17.7	17.9	10	7.2	4.4	4.6	0	0	38.8	15.3	40.7	27
101	2022-01-01	2022-04-12	15.5	16.1	9.4	7.8	2.2	2.8	0	0	41	18.1	40.7	27
102	2022-01-01	2022-04-13	13.6	13.9	10.5	8.3	0.3	0.6	0	0	41.3	18.7	40.7	27
103	2022-01-01	2022-04-14	13.7	14.3	10.7	9.2	0.4	1	0	0	41.7	19.7	40.7	27
104	2022-01-01	2022-04-15	13.5	17.3	9.8	9.7	0.2	4	0	0	41.9	23.7	40.7	27
105	2022-01-01	2022-04-16	12.4	13.3	12.6	13.9	0	0	0	0.6	41.9	23.7	40.7	27.6
106	2022-01-01	2022-04-17	12.2	11.6	14.4	14.3	0	0	1.1	1	41.9	23.7	41.8	28.6
107	2022-01-01	2022-04-18	12.4	10.9	9.5	11.8	0	0	0	0	41.9	23.7	41.8	28.6
108	2022-01-01	2022-04-19	13.8	10.5	9.5	15.3	0.5	0	0	2	42.4	23.7	41.8	30.6
109	2022-01-01	2022-04-20	12.4	9.3	12.9	15.7	0	0	0	2.4	42.4	23.7	41.8	33
110	2022-01-01	2022-04-21	11.8	9.1	12.1	18	0	0	0	4.7	42.4	23.7	41.8	37.7
111	2022-01-01	2022-04-22	11	9.2	14.8	12.7	0	0	1.5	0	42.4	23.7	43.3	37.7
112	2022-01-01	2022-04-23	11.5	10.4	11.6	11.6	0	0	0	0	42.4	23.7	43.3	37.7
113	2022-01-01	2022-04-24	12.6	11	10.2	11.6	0	0	0	0	42.4	23.7	43.3	37.7
114	2022-01-01	2022-04-25	13.3	11.4	10.1	13.1	0	0	0	0	42.4	23.7	43.3	37.7
115	2022-01-01	2022-04-26	15.8	11.7	10.1	12.5	2.5	0	0	0	44.9	23.7	43.3	37.7
116	2022-01-01	2022-04-27	18.2	14.2	11.4	10.6	4.9	0.9	0	0	49.8	24.6	43.3	37.7
117	2022-01-01	2022-04-28	20.6	15.1	11.1	10.5	7.3	1.8	0	0	57.1	26.4	43.3	37.7
118	2022-01-01	2022-04-29	18.1	14.2	11.4	13	4.8	0.9	0	0	61.9	27.3	43.3	37.7
119	2022-01-01	2022-04-30	16.1	14.4	12.1	16.8	2.8	1.1	0	3.5	64.7	28.4	43.3	41.2
120	2022-01-01	2022-05-01	17.3	18.7	13.7	17.9	4	5.4	0.4	4.6	68.7	33.8	43.7	45.8
121	2022-01-01	2022-05-02	20.8	21	16.8	13.8	7.5	7.7	3.5	0.5	76.2	41.5	47.2	46.3
122	2022-01-01	2022-05-03	21.4	18.2	18.1	15.2	8.1	4.9	4.8	1.9	84.3	46.4	52	48.2
123	2022-01-01	2022-05-04	21.2	13.9	14	21.5	7.9	0.6	0.7	8.2	92.2	47	52.7	56.4
124	2022-01-01	2022-05-05	20.5	12.8	15.3	17.6	7.2	0	2	4.3	99.4	47	54.7	60.7
125	2022-01-01	2022-05-06	19.5	14.6	17.9	14.8	6.2	1.3	4.6	1.5	105.6	48.3	59.3	62.2
126	2022-01-01	2022-05-07	18.8	18.7	17.8	15.8	5.5	5.4	4.5	2.5	111.1	53.7	63.8	64.7
127	2022-01-01	2022-05-08	18.7	23.2	13.8	15.8	5.4	9.9	0.5	2.5	116.5	63.6	64.3	67.2
128	2022-01-01	2022-05-09	18.8	16.2	14.7	17.8	5.5	2.9	1.4	4.5	122	66.5	65.7	71.7
129	2022-01-01	2022-05-10	17.4	13.9	12.1	13.8	4.1	0.6	0	0.5	126.1	67.1	65.7	72.2
130	2022-01-01	2022-05-11	16.8	14.8	11.4	10	3.5	1.5	0	0	129.6	68.6	65.7	72.2
131	2022-01-01	2022-05-12	17.3	15.8	11.7	9.3	4	2.5	0	0	133.6	71.1	65.7	72.2
132	2022-01-01	2022-05-13	16.3	14.9	13.1	12.8	3	1.6	0	0	136.6	72.7	65.7	72.2
133	2022-01-01	2022-05-14	14	15.8	16.9	19.2	0.7	2.5	3.6	5.9	137.3	75.2	69.3	78.1
134	2022-01-01	2022-05-15	14.1	16.2	20.1	24.8	0.8	2.9	6.8	11.5	138.1	78.1	76.1	89.6
135	2022-01-01	2022-05-16	17	18.1	16.6	17.9	3.7	4.8	3.3	4.6	141.8	82.9	79.4	94.2
136	2022-01-01	2022-05-17	18	22.1	18.9	20.9	4.7	8.8	5.6	7.6	146.5	91.7	85	101.8
137	2022-01-01	2022-05-18	19.4	22.3	21.4	16.7	6.1	9	8.1	3.4	152.6	100.7	93.1	105.2
138	2022-01-01	2022-05-19	21.5	25.1	17.5	16.9	8.2	11.8	4.2	3.6	160.8	112.5	97.3	108.8
139	2022-01-01	2022-05-20	21.5	19.4	18.8	17.5	8.2	6.1	5.5	4.2	169	118.6	102.8	113
140	2022-01-01	2022-05-21	22	18.1	17.1	20.3	8.7	4.8	3.8	7	177.7	123.4	106.6	120
141	2022-01-01	2022-05-22	20.4	19.3	17.9	22.8	7.1	6	4.6	9.5	184.8	129.4	111.2	129.5
142	2022-01-01	2022-05-23	20.6	20.5	23.3	18.1	7.3	7.2	10	4.8	192.1	136.6	121.2	134.3
143	2022-01-01	2022-05-24	21.8	18.7	21.4	15.3	8.5	5.4	8.1	2	200.6	142	129.3	136.3
144	2022-01-01	2022-05-25	20.7	19.5	13.4	15.6	7.4	6.2	0.1	2.3	208	148.2	129.4	138.6
145	2022-01-01	2022-05-26	20.8	21.1	12.6	16.1	7.5	7.8	0	2.8	215.5	156	129.4	141.4
146	2022-01-01	2022-05-27	21.6	17	13	16.4	8.3	3.7	0	3.1	223.8	159.7	129.4	144.5
147	2022-01-01	2022-05-28	22.5	18	14.6	17.2	9.2	4.7	1.3	3.9	233	164.4	130.7	148.4
148	2022-01-01	2022-05-29	23.9	19.1	18.4	18	10.6	5.8	5.1	4.7	243.6	170.2	135.8	153.1
149	2022-01-01	2022-05-30	22.3	22.3	19.1	18	9	9	5.8	4.7	252.6	179.2	141.6	157.8
150	2022-01-01	2022-05-31	19.2	24.7	16.5	16.1	5.9	11.4	3.2	2.8	258.5	190.6	144.8	160.6
151	2022-01-01	2022-06-01	19.7	21.8	16.6	18.7	6.4	8.5	3.3	5.4	264.9	199.1	148.1	166
152	2022-01-01	2022-06-02	20.4	21.5	17	19.5	7.1	8.2	3.7	6.2	272	207.3	151.8	172.2
153	2022-01-01	2022-06-03	20.5	23	18.8	16.1	7.2	9.7	5.5	2.8	279.2	217	157.3	175
154	2022-01-01	2022-06-04	20.7	23.2	19.4	16.2	7.4	9.9	6.1	2.9	286.6	226.9	163.4	177.9
155	2022-01-01	2022-06-05	20.1	23.3	18.4	13.5	6.8	10	5.1	0.2	293.4	236.9	168.5	178.1
156	2022-01-01	2022-06-06	21.2	23.2	17.2	15.2	7.9	9.9	3.9	1.9	301.3	246.8	172.4	180
157	2022-01-01	2022-06-07	21	23.5	18.4	16.1	7.7	10.2	5.1	2.8	309	257	177.5	182.8
158	2022-01-01	2022-06-08	22	23.8	20.3	16.5	8.7	10.5	7	3.2	317.7	267.5	184.5	186
159	2022-01-01	2022-06-09	22.1	24.1	25.6	17.8	8.8	10.8	12.3	4.5	326.5	278.3	196.8	190.5
160	2022-01-01	2022-06-10	22	23.6	27.4	17.8	8.7	10.3	14.1	4.5	335.2	288.6	210.9	195
161	2022-01-01	2022-06-11	21.5	25.3	23.8	18.3	8.2	12	10.5	5	343.4	300.6	221.4	200
162	2022-01-01	2022-06-12	22.1	26.2	24.6	18.5	8.8	12.9	11.3	5.2	352.2	313.5	232.7	205.2
163	2022-01-01	2022-06-13	22.4	25.9	26.3	18.6	9.1	12.6	13	5.3	361.3	326.1	245.7	210.5
164	2022-01-01	2022-06-14	23.6	23.5	23.2	19.5	10.3	10.2	9.9	6.2	371.6	336.3	255.6	216.7
165	2022-01-01	2022-06-15	25	23.7	22	20.4	11.7	10.4	8.7	7.1	383.3	346.7	264.3	223.8
166	2022-01-01	2022-06-16	25.4	25.1	22.3	22	12.1	11.8	9	8.7	395.4	358.5	273.3	232.5
167	2022-01-01	2022-06-17	23.9	25.6	22.9	21.3	10.6	12.3	9.6	8	406	370.8	282.9	240.5
168	2022-01-01	2022-06-18	23.7	25.3	24.3	19.9	10.4	12	11	6.6	416.4	382.8	293.9	247.1
169	2022-01-01	2022-06-19	23	25.5	24.3	19.6	9.7	12.2	11	6.3	426.1	395	304.9	253.4
170	2022-01-01	2022-06-20	22.9	24.7	23.8	21.5	9.6	11.4	10.5	8.2	435.7	406.4	315.4	261.6
171	2022-01-01	2022-06-21	23.6	25.2	21.8	22.3	10.3	11.9	8.5	9	446	418.3	323.9	270.6
172	2022-01-01	2022-06-22	24.5	24.8	21.8	23.1	11.2	11.5	8.5	9.8	457.2	429.8	332.4	280.4
173	2022-01-01	2022-06-23	24.5	23.8	20.8	23	11.2	10.5	7.5	9.7	468.4	440.3	339.9	290.1
174	2022-01-01	2022-06-24	21.9	25	22.6	23.4	8.6	11.7	9.3	10.1	477	452	349.2	300.2
175	2022-01-01	2022-06-25	23.6	24.6	24.7	23.4	10.3	11.3	11.4	10.1	487.3	463.3	360.6	310.3
176	2022-01-01	2022-06-26	24	25.6	26	23.9	10.7	12.3	12.7	10.6	498	475.6	373.3	320.9
177	2022-01-01	2022-06-27	25.2	26.8	23.8	24	11.9	13.5	10.5	10.7	509.9	489.1	383.8	331.6
178	2022-01-01	2022-06-28	25.8	25.2	23.6	24	12.5	11.9	10.3	10.7	522.4	501	394.1	342.3
179	2022-01-01	2022-06-29	27.1	23.2	24.1	24.3	13.8	9.9	10.8	11	536.2	510.9	404.9	353.3
180	2022-01-01	2022-06-30	27.8	22.4	24.5	23.8	14.5	9.1	11.2	10.5	550.7	520	416.1	363.8
181	2022-01-01	2022-07-01	26.1	20.1	24.2	23.7	12.8	6.8	10.9	10.4	563.5	526.8	427	374.2
182	2022-01-01	2022-07-02	25.7	20.2	23.8	24.3	12.4	6.9	10.5	11	575.9	533.7	437.5	385.2
183	2022-01-01	2022-07-03	25.2	20.9	24.2	25.3	11.9	7.6	10.9	12	587.8	541.3	448.4	397.2
184	2022-01-01	2022-07-04	24.2	23.6	25.3	26.1	10.9	10.3	12	12.8	598.7	551.6	460.4	410
185	2022-01-01	2022-07-05	23.4	23.4	26.6	24.9	10.1	10.1	13.3	11.6	608.8	561.7	473.7	421.6
186	2022-01-01	2022-07-06	23.3	23	27.4	19.3	10	9.7	14.1	6	618.8	571.4	487.8	427.6
187	2022-01-01	2022-07-07	21.8	23.2	27.1	22.5	8.5	9.9	13.8	9.2	627.3	581.3	501.6	436.8
188	2022-01-01	2022-07-08	22.9	24	27.6	23.3	9.6	10.7	14.3	10	636.9	592	515.9	446.8
189	2022-01-01	2022-07-09	24.1	23.2	28.5	23.6	10.8	9.9	15.2	10.3	647.7	601.9	531.1	457.1
190	2022-01-01	2022-07-10	25.3	22.8	26.9	24.2	12	9.5	13.6	10.9	659.7	611.4	544.7	468
191	2022-01-01	2022-07-11	27	23.3	22.7	25	13.7	10	9.4	11.7	673.4	621.4	554.1	479.7
192	2022-01-01	2022-07-12	26.6	22.9	23.9	25.1	13.3	9.6	10.6	11.8	686.7	631	564.7	491.5
193	2022-01-01	2022-07-13	25.9	21.8	24.9	24.8	12.6	8.5	11.6	11.5	699.3	639.5	576.3	503
194	2022-01-01	2022-07-14	25.4	21.3	25.2	25.1	12.1	8	11.9	11.8	711.4	647.5	588.2	514.8
195	2022-01-01	2022-07-15	24.6	20.8	22	25.2	11.3	7.5	8.7	11.9	722.7	655	596.9	526.7
196	2022-01-01	2022-07-16	20.9	19.8	22.2	25.3	7.6	6.5	8.9	12	730.3	661.5	605.8	538.7
197	2022-01-01	2022-07-17	19.7	20.7	23.1	25.7	6.4	7.4	9.8	12.4	736.7	668.9	615.6	551.1
198	2022-01-01	2022-07-18	20.8	21.5	24	26.9	7.5	8.2	10.7	13.6	744.2	677.1	626.3	564.7
199	2022-01-01	2022-07-19	23.2	22.1	24.4	27.1	9.9	8.8	11.1	13.8	754.1	685.9	637.4	578.5
200	2022-01-01	2022-07-20	22.9	21.9	25.1	27.1	9.6	8.6	11.8	13.8	763.7	694.5	649.2	592.3
201	2022-01-01	2022-07-21	23.3	22.8	25.4	27.5	10	9.5	12.1	14.2	773.7	704	661.3	606.5
202	2022-01-01	2022-07-22	23.8	23	26.1	27.4	10.5	9.7	12.8	14.1	784.2	713.7	674.1	620.6
203	2022-01-01	2022-07-23	24	21.9	25.3	26	10.7	8.6	12	12.7	794.9	722.3	686.1	633.3
204	2022-01-01	2022-07-24	24.1	22.5	23.8	20.7	10.8	9.2	10.5	7.4	805.7	731.5	696.6	640.7
205	2022-01-01	2022-07-25	25	23.3	24.3	23	11.7	10	11	9.7	817.4	741.5	707.6	650.4
206	2022-01-01	2022-07-26	27.8	20.9	25	24.2	14.5	7.6	11.7	10.9	831.9	749.1	719.3	661.3
207	2022-01-01	2022-07-27	27.6	20.7	25.4	25.7	14.3	7.4	12.1	12.4	846.2	756.5	731.4	673.7
208	2022-01-01	2022-07-28	25.9	21.7	26.7	23.1	12.6	8.4	13.4	9.8	858.8	764.9	744.8	683.5
209	2022-01-01	2022-07-29	26.5	22.9	26.5	23.5	13.2	9.6	13.2	10.2	872	774.5	758	693.7
210	2022-01-01	2022-07-30	26.6	23.5	25	24.4	13.3	10.2	11.7	11.1	885.3	784.7	769.7	704.8
211	2022-01-01	2022-07-31	26.6	24.7	24.2	24.9	13.3	11.4	10.9	11.6	898.6	796.1	780.6	716.4
212	2022-01-01	2022-08-01	27.1	24.7	24.7	24.7	13.8	11.4	11.4	11.4	912.4	807.5	792	727.8
213	2022-01-01	2022-08-02	27.7	24.4	25.4	25.4	14.4	11.1	12.1	12.1	926.8	818.6	804.1	739.9
214	2022-01-01	2022-08-03	26.6	24.4	25.5	26.3	13.3	11.1	12.2	13	940.1	829.7	816.3	752.9
215	2022-01-01	2022-08-04	24.6	22.9	23.9	26.7	11.3	9.6	10.6	13.4	951.4	839.3	826.9	766.3
216	2022-01-01	2022-08-05	22.5	22.9	22.9	27.2	9.2	9.6	9.6	13.9	960.6	848.9	836.5	780.2
217	2022-01-01	2022-08-06	23.8	21	23.5	27.1	10.5	7.7	10.2	13.8	971.1	856.6	846.7	794
218	2022-01-01	2022-08-07	25.3	20.1	24.7	28.1	12	6.8	11.4	14.8	983.1	863.4	858.1	808.8
219	2022-01-01	2022-08-08	26	21.3	24.7	28.9	12.7	8	11.4	15.6	995.8	871.4	869.5	824.4
220	2022-01-01	2022-08-09	25.4	22.3	25.6	25.9	12.1	9	12.3	12.6	1007.9	880.4	881.8	837
221	2022-01-01	2022-08-10	23.5	23.9	25.8	25	10.2	10.6	12.5	11.7	1018.1	891	894.3	848.7
222	2022-01-01	2022-08-11	23.5	24.1	26.6	23.9	10.2	10.8	13.3	10.6	1028.3	901.8	907.6	859.3
223	2022-01-01	2022-08-12	23.2	24.3	27	23.4	9.9	11	13.7	10.1	1038.2	912.8	921.3	869.4
224	2022-01-01	2022-08-13	22.8	23.9	24.4	23.9	9.5	10.6	11.1	10.6	1047.7	923.4	932.4	880
225	2022-01-01	2022-08-14	22.2	24	23.5	22.3	8.9	10.7	10.2	9	1056.6	934.1	942.6	889
226	2022-01-01	2022-08-15	23.2	25.9	24.3	22	9.9	12.6	11	8.7	1066.5	946.7	953.6	897.7
227	2022-01-01	2022-08-16	24.8	26.7	23.3	22.7	11.5	13.4	10	9.4	1078	960.1	963.6	907.1
228	2022-01-01	2022-08-17	25.5	26	22.7	23	12.2	12.7	9.4	9.7	1090.2	972.8	973	916.8
229	2022-01-01	2022-08-18	25.3	23.2	22.9	23.2	12	9.9	9.6	9.9	1102.2	982.7	982.6	926.7
230	2022-01-01	2022-08-19	24.6	23	23.8	24.5	11.3	9.7	10.5	11.2	1113.5	992.4	993.1	937.9
231	2022-01-01	2022-08-20	24.1	24.7	23.9	24.5	10.8	11.4	10.6	11.2	1124.3	1003.8	1003.7	949.1
232	2022-01-01	2022-08-21	25.3	24.9	24.7	23.3	12	11.6	11.4	10	1136.3	1015.4	1015.1	959.1
233	2022-01-01	2022-08-22	25.6	25.3	25.2	23	12.3	12	11.9	9.7	1148.6	1027.4	1027	968.8
234	2022-01-01	2022-08-23	25.2	25.6	24.5	22.9	11.9	12.3	11.2	9.6	1160.5	1039.7	1038.2	978.4
235	2022-01-01	2022-08-24	25.2	25.2	23.4	24.7	11.9	11.9	10.1	11.4	1172.4	1051.6	1048.3	989.8
236	2022-01-01	2022-08-25	26	24.5	22.7	24.9	12.7	11.2	9.4	11.6	1185.1	1062.8	1057.7	1001.4
237	2022-01-01	2022-08-26	26.7	24.6	22.9	25.1	13.4	11.3	9.6	11.8	1198.5	1074.1	1067.3	1013.2
238	2022-01-01	2022-08-27	26.1	24.9	24.1	25.6	12.8	11.6	10.8	12.3	1211.3	1085.7	1078.1	1025.5
239	2022-01-01	2022-08-28	26.4	25.5	24.1	25.4	13.1	12.2	10.8	12.1	1224.4	1097.9	1088.9	1037.6
240	2022-01-01	2022-08-29	26.4	24.7	24.2	26.6	13.1	11.4	10.9	13.3	1237.5	1109.3	1099.8	1050.9
241	2022-01-01	2022-08-30	26.9	24.7	23.3	27.1	13.6	11.4	10	13.8	1251.1	1120.7	1109.8	1064.7
242	2022-01-01	2022-08-31	27.2	24.3	23.4	28.4	13.9	11	10.1	15.1	1265	1131.7	1119.9	1079.8
243	2022-01-01	2022-09-01	24.8	24.3	24.9	25.6	11.5	11	11.6	12.3	1276.5	1142.7	1131.5	1092.1
244	2022-01-01	2022-09-02	23.7	24.1	26.3	25.2	10.4	10.8	13	11.9	1286.9	1153.5	1144.5	1104
245	2022-01-01	2022-09-03	25.5	23.8	26.1	21.7	12.2	10.5	12.8	8.4	1299.1	1164	1157.3	1112.4
246	2022-01-01	2022-09-04	25.3	23	26.5	18.1	12	9.7	13.2	4.8	1311.1	1173.7	1170.5	1117.2
247	2022-01-01	2022-09-05	25.3	23.3	25.5	18.2	12	10	12.2	4.9	1323.1	1183.7	1182.7	1122.1
248	2022-01-01	2022-09-06	25.6	23.7	28.8	19.1	12.3	10.4	15.5	5.8	1335.4	1194.1	1198.2	1127.9
249	2022-01-01	2022-09-07	25.4	23.1	26.2	20.8	12.1	9.8	12.9	7.5	1347.5	1203.9	1211.1	1135.4
250	2022-01-01	2022-09-08	23.1	20.8	23.1	20.1	9.8	7.5	9.8	6.8	1357.3	1211.4	1220.9	1142.2
251	2022-01-01	2022-09-09	19.6	20.5	22.6	20	6.3	7.2	9.3	6.7	1363.6	1218.6	1230.2	1148.9
252	2022-01-01	2022-09-10	21	22	23.1	21.5	7.7	8.7	9.8	8.2	1371.3	1227.3	1240	1157.1
253	2022-01-01	2022-09-11	20.2	22.2	23.4	21.9	6.9	8.9	10.1	8.6	1378.2	1236.2	1250.1	1165.7
254	2022-01-01	2022-09-12	18.7	21.8	23.4	19.6	5.4	8.5	10.1	6.3	1383.6	1244.7	1260.2	1172
255	2022-01-01	2022-09-13	20	22	24.6	20.4	6.7	8.7	11.3	7.1	1390.3	1253.4	1271.5	1179.1
256	2022-01-01	2022-09-14	22.7	21.7	24.8	20.6	9.4	8.4	11.5	7.3	1399.7	1261.8	1283	1186.4
257	2022-01-01	2022-09-15	24.4	21.7	24.8	21.1	11.1	8.4	11.5	7.8	1410.8	1270.2	1294.5	1194.2
258	2022-01-01	2022-09-16	21.8	21.4	25.1	21.1	8.5	8.1	11.8	7.8	1419.3	1278.3	1306.3	1202
259	2022-01-01	2022-09-17	20	20.8	24.9	19.5	6.7	7.5	11.6	6.2	1426	1285.8	1317.9	1208.2
260	2022-01-01	2022-09-18	19.2	19.4	24.4	18.6	5.9	6.1	11.1	5.3	1431.9	1291.9	1329	1213.5
261	2022-01-01	2022-09-19	19.7	19.3	24.4	19.1	6.4	6	11.1	5.8	1438.3	1297.9	1340.1	1219.3
262	2022-01-01	2022-09-20	20	20.5	24.2	18.9	6.7	7.2	10.9	5.6	1445	1305.1	1351	1224.9
263	2022-01-01	2022-09-21	20.6	19.9	20.4	20	7.3	6.6	7.1	6.7	1452.3	1311.7	1358.1	1231.6
264	2022-01-01	2022-09-22	21.7	15.5	19.3	20	8.4	2.2	6	6.7	1460.7	1313.9	1364.1	1238.3
265	2022-01-01	2022-09-23	21.9	12.2	20.4	18	8.6	0	7.1	4.7	1469.3	1313.9	1371.2	1243
266	2022-01-01	2022-09-24	22	14.9	22.7	13.9	8.7	1.6	9.4	0.6	1478	1315.5	1380.6	1243.6
267	2022-01-01	2022-09-25	21.1	16.3	22.7	14.6	7.8	3	9.4	1.3	1485.8	1318.5	1390	1244.9
268	2022-01-01	2022-09-26	22.4	19.4	23	12.4	9.1	6.1	9.7	0	1494.9	1324.6	1399.7	1244.9
269	2022-01-01	2022-09-27	16.8	17.3	23.4	12.8	3.5	4	10.1	0	1498.4	1328.6	1409.8	1244.9
270	2022-01-01	2022-09-28	16.9	18.9	23.3	13.9	3.6	5.6	10	0.6	1502	1334.2	1419.8	1245.5
271	2022-01-01	2022-09-29	17.6	17.9	23.7	15.6	4.3	4.6	10.4	2.3	1506.3	1338.8	1430.2	1247.8
272	2022-01-01	2022-09-30	19.4	17.4	23.7	16.6	6.1	4.1	10.4	3.3	1512.4	1342.9	1440.6	1251.1
273	2022-01-01	2022-10-01	19.6	18.1	23	16.9	6.3	4.8	9.7	3.6	1518.7	1347.7	1450.3	1254.7
274	2022-01-01	2022-10-02	20.4	19.3	22.3	15.1	7.1	6	9	1.8	1525.8	1353.7	1459.3	1256.5
275	2022-01-01	2022-10-03	22.8	19.8	21.1	17	9.5	6.5	7.8	3.7	1535.3	1360.2	1467.1	1260.2
276	2022-01-01	2022-10-04	20.1	21.9	19	15.3	6.8	8.6	5.7	2	1542.1	1368.8	1472.8	1262.2
277	2022-01-01	2022-10-05	17.7	21.6	18.5	13.8	4.4	8.3	5.2	0.5	1546.5	1377.1	1478	1262.7
278	2022-01-01	2022-10-06	13.5	22.5	20.2	14	0.2	9.2	6.9	0.7	1546.7	1386.3	1484.9	1263.4
279	2022-01-01	2022-10-07	13.2	18.3	19.6	14.7	0	5	6.3	1.4	1546.7	1391.3	1491.2	1264.8
280	2022-01-01	2022-10-08	16.2	14.8	19.4	15	2.9	1.5	6.1	1.7	1549.6	1392.8	1497.3	1266.5
281	2022-01-01	2022-10-09	18.9	17.2	19.5	15.9	5.6	3.9	6.2	2.6	1555.2	1396.7	1503.5	1269.1
282	2022-01-01	2022-10-10	18.6	15.7	20.4	16	5.3	2.4	7.1	2.7	1560.5	1399.1	1510.6	1271.8
283	2022-01-01	2022-10-11	19.4	16.6	22.3	16.3	6.1	3.3	9	3	1566.6	1402.4	1519.6	1274.8
284	2022-01-01	2022-10-12	19	18.2	22.3	16.9	5.7	4.9	9	3.6	1572.3	1407.3	1528.6	1278.4
285	2022-01-01	2022-10-13	19.1	16.9	20.5	16.7	5.8	3.6	7.2	3.4	1578.1	1410.9	1535.8	1281.8
286	2022-01-01	2022-10-14	19.7	15.9	19.8	17.8	6.4	2.6	6.5	4.5	1584.5	1413.5	1542.3	1286.3
287	2022-01-01	2022-10-15	19.4	17.5	22	17.8	6.1	4.2	8.7	4.5	1590.6	1417.7	1551	1290.8
288	2022-01-01	2022-10-16	18.5	18.5	23.8	18.3	5.2	5.2	10.5	5	1595.8	1422.9	1561.5	1295.8
289	2022-01-01	2022-10-17	18.7	18	20.6	18.1	5.4	4.7	7.3	4.8	1601.2	1427.6	1568.8	1300.6
290	2022-01-01	2022-10-18	19	18.3	20.5	17.9	5.7	5	7.2	4.6	1606.9	1432.6	1576	1305.2
291	2022-01-01	2022-10-19	18.3	18.2	20.1	16.6	5	4.9	6.8	3.3	1611.9	1437.5	1582.8	1308.5
292	2022-01-01	2022-10-20	18.4	18.3	21.2	13.7	5.1	5	7.9	0.4	1617	1442.5	1590.7	1308.9
293	2022-01-01	2022-10-21	17.5	18.2	18.6	11.4	4.2	4.9	5.3	0	1621.2	1447.4	1596	1308.9
294	2022-01-01	2022-10-22	17.4	17.8	14.8	11.6	4.1	4.5	1.5	0	1625.3	1451.9	1597.5	1308.9
295	2022-01-01	2022-10-23	16.1	17.9	14.4	14.5	2.8	4.6	1.1	1.2	1628.1	1456.5	1598.6	1310.1
296	2022-01-01	2022-10-24	16.1	17.1	15.5	15.3	2.8	3.8	2.2	2	1630.9	1460.3	1600.8	1312.1
297	2022-01-01	2022-10-25	16.3	17	16	14.6	3	3.7	2.7	1.3	1633.9	1464	1603.5	1313.4
298	2022-01-01	2022-10-26	14.6	17	17.4	11.6	1.3	3.7	4.1	0	1635.2	1467.7	1607.6	1313.4
299	2022-01-01	2022-10-27	10.3	16.5	19	10.2	0	3.2	5.7	0	1635.2	1470.9	1613.3	1313.4
300	2022-01-01	2022-10-28	10	16.5	20.5	11.2	0	3.2	7.2	0	1635.2	1474.1	1620.5	1313.4
301	2022-01-01	2022-10-29	13.5	16.2	20.1	12	0.2	2.9	6.8	0	1635.4	1477	1627.3	1313.4
302	2022-01-01	2022-10-30	16.3	16.2	21	13.5	3	2.9	7.7	0.2	1638.4	1479.9	1635	1313.6
303	2022-01-01	2022-10-31	17.2	13.8	21	13.2	3.9	0.5	7.7	0	1642.3	1480.4	1642.7	1313.6
304	2022-01-01	2022-11-01	16.1	11.7	18.7	15.6	2.8	0	5.4	2.3	1645.1	1480.4	1648.1	1315.9
305	2022-01-01	2022-11-02	16.3	10.7	17.3	17.5	3	0	4	4.2	1648.1	1480.4	1652.1	1320.1
306	2022-01-01	2022-11-03	16.4	10.2	15	18.1	3.1	0	1.7	4.8	1651.2	1480.4	1653.8	1324.9
307	2022-01-01	2022-11-04	16.8	10.2	13.3	18.2	3.5	0	0	4.9	1654.7	1480.4	1653.8	1329.8
308	2022-01-01	2022-11-05	16.4	12.2	14.1	16.7	3.1	0	0.8	3.4	1657.8	1480.4	1654.6	1333.2
309	2022-01-01	2022-11-06	14.6	15	17.4	17.3	1.3	1.7	4.1	4	1659.1	1482.1	1658.7	1337.2
310	2022-01-01	2022-11-07	14.6	17.2	18.7	16.9	1.3	3.9	5.4	3.6	1660.4	1486	1664.1	1340.8
311	2022-01-01	2022-11-08	14.6	18.4	16.8	14.1	1.3	5.1	3.5	0.8	1661.7	1491.1	1667.6	1341.6
312	2022-01-01	2022-11-09	13.9	19.3	11.9	14.8	0.6	6	0	1.5	1662.3	1497.1	1667.6	1343.1
313	2022-01-01	2022-11-10	13.5	18.3	11.1	16.1	0.2	5	0	2.8	1662.5	1502.1	1667.6	1345.9
314	2022-01-01	2022-11-11	13.2	16.9	12.9	13.8	0	3.6	0	0.5	1662.5	1505.7	1667.6	1346.4
315	2022-01-01	2022-11-12	13.4	17.9	13.2	9.5	0.1	4.6	0	0	1662.6	1510.3	1667.6	1346.4
316	2022-01-01	2022-11-13	12.3	16.5	13.2	9.9	0	3.2	0	0	1662.6	1513.5	1667.6	1346.4
317	2022-01-01	2022-11-14	8.5	16.5	12.4	10.7	0	3.2	0	0	1662.6	1516.7	1667.6	1346.4
318	2022-01-01	2022-11-15	7.8	17.5	12.1	11.6	0	4.2	0	0	1662.6	1520.9	1667.6	1346.4
319	2022-01-01	2022-11-16	8.8	16.9	12.6	12.7	0	3.6	0	0	1662.6	1524.5	1667.6	1346.4
320	2022-01-01	2022-11-17	10.3	14.3	12	11.8	0	1	0	0	1662.6	1525.5	1667.6	1346.4
321	2022-01-01	2022-11-18	9.5	12.7	10.1	11.2	0	0	0	0	1662.6	1525.5	1667.6	1346.4
322	2022-01-01	2022-11-19	9.2	13.4	9.4	11.4	0	0.1	0	0	1662.6	1525.6	1667.6	1346.4
323	2022-01-01	2022-11-20	9.9	12.7	7.4	10.3	0	0	0	0	1662.6	1525.6	1667.6	1346.4
324	2022-01-01	2022-11-21	12.4	12.7	6.3	9	0	0	0	0	1662.6	1525.6	1667.6	1346.4
325	2022-01-01	2022-11-22	10.5	11.6	7.7	9.4	0	0	0	0	1662.6	1525.6	1667.6	1346.4
326	2022-01-01	2022-11-23	10.9	11.4	9.2	12	0	0	0	0	1662.6	1525.6	1667.6	1346.4
327	2022-01-01	2022-11-24	10.7	10.5	7.9	12.3	0	0	0	0	1662.6	1525.6	1667.6	1346.4
328	2022-01-01	2022-11-25	10.3	10.3	4	9.8	0	0	0	0	1662.6	1525.6	1667.6	1346.4
329	2022-01-01	2022-11-26	9.7	11.3	7	7.5	0	0	0	0	1662.6	1525.6	1667.6	1346.4
330	2022-01-01	2022-11-27	10.9	12.6	7.7	9.1	0	0	0	0	1662.6	1525.6	1667.6	1346.4
331	2022-01-01	2022-11-28	12.5	15.8	6.4	12.1	0	2.5	0	0	1662.6	1528.1	1667.6	1346.4
332	2022-01-01	2022-11-29	14.6	10.8	7.8	14.2	1.3	0	0	0.9	1663.9	1528.1	1667.6	1347.3
333	2022-01-01	2022-11-30	12.6	12.4	10.1	17.8	0	0	0	4.5	1663.9	1528.1	1667.6	1351.8
334	2022-01-01	2022-12-01	12.5	12.7	11.6	16.3	0	0	0	3	1663.9	1528.1	1667.6	1354.8
335	2022-01-01	2022-12-02	12	10.8	11.8	8.9	0	0	0	0	1663.9	1528.1	1667.6	1354.8
336	2022-01-01	2022-12-03	9.2	5.6	11.2	6.4	0	0	0	0	1663.9	1528.1	1667.6	1354.8
337	2022-01-01	2022-12-04	9.8	5.6	11.8	9	0	0	0	0	1663.9	1528.1	1667.6	1354.8
338	2022-01-01	2022-12-05	11.2	5.1	12.5	11.8	0	0	0	0	1663.9	1528.1	1667.6	1354.8
339	2022-01-01	2022-12-06	14.4	4.6	11.4	13	1.1	0	0	0	1665	1528.1	1667.6	1354.8
340	2022-01-01	2022-12-07	10.9	6.1	11.3	12.9	0	0	0	0	1665	1528.1	1667.6	1354.8
341	2022-01-01	2022-12-08	8	7.3	10.4	16	0	0	0	2.7	1665	1528.1	1667.6	1357.5
342	2022-01-01	2022-12-09	6.3	8.5	9.7	18.8	0	0	0	5.5	1665	1528.1	1667.6	1363
343	2022-01-01	2022-12-10	7.9	7.9	9.8	12.1	0	0	0	0	1665	1528.1	1667.6	1363
344	2022-01-01	2022-12-11	12.4	9.2	9.8	10.9	0	0	0	0	1665	1528.1	1667.6	1363
345	2022-01-01	2022-12-12	13.7	10.1	9.3	12.7	0.4	0	0	0	1665.4	1528.1	1667.6	1363
346	2022-01-01	2022-12-13	8.8	10.5	10.4	14.2	0	0	0	0.9	1665.4	1528.1	1667.6	1363.9
347	2022-01-01	2022-12-14	5.8	11.2	12.5	13.8	0	0	0	0.5	1665.4	1528.1	1667.6	1364.4
348	2022-01-01	2022-12-15	5.2	14.7	15	12.3	0	1.4	1.7	0	1665.4	1529.5	1669.3	1364.4
349	2022-01-01	2022-12-16	7.5	15.1	15.1	13.9	0	1.8	1.8	0.6	1665.4	1531.3	1671.1	1365
350	2022-01-01	2022-12-17	10.3	11.6	16.4	13.9	0	0	3.1	0.6	1665.4	1531.3	1674.2	1365.6
351	2022-01-01	2022-12-18	11.7	9.9	14.9	10	0	0	1.6	0	1665.4	1531.3	1675.8	1365.6
352	2022-01-01	2022-12-19	11.2	10.5	8.5	7.4	0	0	0	0	1665.4	1531.3	1675.8	1365.6
353	2022-01-01	2022-12-20	11.1	11.5	8.1	5.6	0	0	0	0	1665.4	1531.3	1675.8	1365.6
354	2022-01-01	2022-12-21	13.5	10.6	8.6	7.6	0.2	0	0	0	1665.6	1531.3	1675.8	1365.6
355	2022-01-01	2022-12-22	9.7	11.6	6.4	5.5	0	0	0	0	1665.6	1531.3	1675.8	1365.6
356	2022-01-01	2022-12-23	7.1	12.8	6.1	-0.2	0	0	0	0	1665.6	1531.3	1675.8	1365.6
357	2022-01-01	2022-12-24	9.7	16.7	6	-2	0	3.4	0	0	1665.6	1534.7	1675.8	1365.6
358	2022-01-01	2022-12-25	6.8	18.3	4.2	0.2	0	5	0	0	1665.6	1539.7	1675.8	1365.6
359	2022-01-01	2022-12-26	8.3	17.9	3.5	4.9	0	4.6	0	0	1665.6	1544.3	1675.8	1365.6
360	2022-01-01	2022-12-27	3.1	15.2	5.4	8.2	0	1.9	0	0	1665.6	1546.2	1675.8	1365.6
361	2022-01-01	2022-12-28	3.7	11.8	10.8	10.7	0	0	0	0	1665.6	1546.2	1675.8	1365.6
362	2022-01-01	2022-12-29	3.3	7.8	12.5	11.7	0	0	0	0	1665.6	1546.2	1675.8	1365.6
363	2022-01-01	2022-12-30	4.8	9	13.2	10.9	0	0	0	0	1665.6	1546.2	1675.8	1365.6
364	2022-01-01	2022-12-31	5.6	10.1	13.7	9.9	0	0	0.4	0	1665.6	1546.2	1676.2	1365.6
365	2022-01-01	2023-01-01	4.5	9.2	12.8	9.5	0	0	0	0	1665.6	1546.2	1676.2	1365.6
					12.9
